1 **The interaction between genotype and maternal nutritional environments affects tomato**  
2 **seed and seedling quality**

3

4 Nafiseh Geshnizjani<sup>1</sup>, Saadat Sarikhani Khorami<sup>2</sup>, Leo A.J. Willems<sup>1</sup>, Basten L. Snoek<sup>3,4</sup>,  
5 Henk W.M. Hilhorst<sup>1</sup>, Wilco Ligterink<sup>1\*</sup>

6

7 <sup>1</sup> Wageningen Seed Lab, Laboratory of Plant Physiology, Wageningen University,  
8 Droevendaalsesteeg 1, 6708 PB Wageningen, The Netherlands

9 <sup>2</sup> Aburaihan Campus, University of Tehran, Imam Reza blvd., Pakdasht, Tehran, PO box:  
10 3391653755, Iran.

11 <sup>3</sup> Laboratory of Nematology, Wageningen University, Droevendaalsesteeg 1, 6708 PB  
12 Wageningen, The Netherlands

13 <sup>4</sup> Theoretical Biology and Bioinformatics, Utrecht University, Padualaan 8, 3584 CH Utrecht,  
14 The Netherlands

15

16 \*Corresponding author: W. Ligterink, Droevendaalsesteeg 1, 6708 PB Wageningen, The  
17 Netherlands. Tel +31 6 18 77 56 84 , fax: +31 317 41 80 94, e-mail: [wilco.ligterink@wur.nl](mailto:wilco.ligterink@wur.nl)

18

19 E-mail addresses of other authors:

20 Nafiseh Geshnizjani [nafiseh.geshnizjani@wur.nl](mailto:nafiseh.geshnizjani@wur.nl)

21 Saadat Sarikhani Khorami [saadat.sarikhani@ut.ac.ir](mailto:saadat.sarikhani@ut.ac.ir)

22 Leo A.J. Willems [leo.willems@wur.nl](mailto:leo.willems@wur.nl)

23 Basten L. Snoek [snoek.basten@gmail.com](mailto:snoek.basten@gmail.com)

24 Henk W.M. Hilhorst [henk.hilhorst@wur.nl](mailto:henk.hilhorst@wur.nl)

25

26 Date of submission: 31-10-2018

27 Number of tables: 2

28 Number of figures: 8 (Figures number 4, 5, 6 and 7 should be in colour in print and online)

29 Number of words: 6309

30 Number of supplementary tables: 2

31 Number of supplementary figures: 4

32

33 **The interaction between genotype and maternal nutritional environments affects tomato**  
34 **seed and seedling quality**

35

36 **Running title: G×E effects on tomato seed and seedling quality**

37

38

39

40

41 **Highlight**

42 The presented data specifically provides knowledge towards understanding a multi-level  
43 effect of the maternal nutritional environment on seed and seedling characteristics in tomato.

44 We show a clear genotype by environment interactions (G×E) especially for maternal growth  
45 on different nitrate concentrations. Additionally we identified metabolites with either positive  
46 or negative correlations with maternal environment affected phenotypical traits.

47

48

49

50

51

52

53

54

55

56

57

58

59

60

61

62

63

64

65

66

67 **Abstract**

68 Seed and seedling traits are affected by the conditions of the maternal environment, such as  
69 light, temperature and nutrient availability. In this study, we have investigated whether  
70 different maternally applied nitrate and phosphate concentrations affect the seed and seedling  
71 performance of two tomato genotypes: *Solanum lycopersicum* cv. Money maker and *Solanum*  
72 *pimpinellifolium* accession CGN14498. We observed large differences for seed and seedling  
73 traits between the two genotypes. Additionally, we have shown that for nitrate most of the  
74 seed and seedling traits were significantly affected by genotype by environment interactions  
75 (G×E). The effect of the maternal environment was clearly visible in the primary metabolites  
76 of the dry seeds. For example, we could show that the amount of  $\gamma$ -aminobutyric acid  
77 (GABA) in Money maker seeds was affected by the differences in the maternal environments  
78 and was positively correlated with seed germination under high temperature. Overall,  
79 compared to phosphate, nitrate had a larger effect on seed and seedling performance in  
80 tomato. In general, the different responses to the maternal environments of the two tomato  
81 genotypes show a major role of genotype by environment interactions in shaping seed and  
82 seedling traits.

83

84 **Key words:** Genotype by environment interaction (G×E), maternal environment, metabolites,  
85 seed quality, seedling quality, *Solanum lycopersicum*, *Solanum pimpinellifolium*

86

87

88

89

90

91

92

93

94

95

96

97

98

99

100

---

Abbreviations

---

|                                    |                                                                 |
|------------------------------------|-----------------------------------------------------------------|
| <b>AUC</b>                         | area under the germination curve                                |
| <b>DWR</b>                         | dry weight of root                                              |
| <b>DWSH</b>                        | dry weight of shoot                                             |
| <b>FWR</b>                         | fresh weight of root                                            |
| <b>FWSH</b>                        | fresh weight of shoot                                           |
| <b>G<sub>max</sub></b>             | maximum germination                                             |
| <b>G×E</b>                         | genotype by environment interactions                            |
| <b>HCL</b>                         | hydrochloric acid                                               |
| <b>HT</b>                          | high temperature                                                |
| <b>MM</b>                          | <i>Solanum lycopersicum</i> cv. Money maker                     |
| <b>MRL</b>                         | main root length                                                |
| <b>NLR</b>                         | number of lateral root                                          |
| <b>PCA</b>                         | principle component analysis                                    |
| <b>PI</b>                          | <i>Solanum pimpinellifolium</i>                                 |
| <b>T<sub>50</sub><sup>-1</sup></b> | reciprocal of time to reach 50% of germination                  |
| <b>TCA</b>                         | tricarboxylic acid                                              |
| <b>U<sub>8416</sub></b>            | uniformity of germination or time from 16% till 84% germination |

---

101

102

103

104

105

106

107

108

109

110

111

112

113

114

115

116

117 **Introduction**

118 Seeds, as the start point of the life cycle of plants, can be considered as the key life stage in  
119 many crops like tomato. High quality and well developed seeds are crucial for a successful  
120 life cycle of crops, from seedling establishment through to fruit and seed production,  
121 especially under stressful environmental conditions. Seed quality is a complex trait and is  
122 composed of different quality characteristics including physical, physiological, genetic and  
123 seed health quality (Sperling *et al.*, 2004). In addition, seed quality is influenced by many  
124 environmental cues such as drought, light and temperature (Rowse and Finch-Savage, 2003).  
125 Establishment of seed quality starts at the position where the plants grow, produce and mature  
126 their seeds (Delouche and Baskin, 1971). The maternal environment under which seeds  
127 develop and mature, including the climate and growth conditions, has a profound influence on  
128 seed quality (Delouche, 1980). Maternal environmental effects are defined as a specific  
129 phenomenon in which the phenotype of offspring is influenced by the environment that the  
130 maternal plant is exposed to (Donohue, 2009). It has been reported that different temperatures  
131 (Demir *et al.*, 2004; He *et al.*, 2014; Schmuths *et al.*, 2006), photoperiod (Munir *et al.*, 2001;  
132 Pourrat and Jacques, 1975) and nutrient conditions (Alboresi *et al.*, 2005; He *et al.*, 2014)  
133 during seed development and maturation may result in differences in seed performance in  
134 plants such as tomato and Arabidopsis.  
135 Seed performance traits, such as seed dormancy and germinability, can be influenced by  
136 different environmental conditions. The germinability of a seed batch is defined as the  
137 percentage of seed germination during a specific time interval (Fenner, 1991). There are many  
138 reports on the influence of environmental conditions under which seeds develop and mature  
139 on seed dormancy and germinability. For instance, for *Solanum lycopersicum* (Varis and  
140 George, 1985), *Nicotiana tabacum* (Thomas and Raper, 1979), *Sisymbrium officinale*  
141 (Hilhorst and Karssen, 1988), *Arabidopsis thaliana* (Alboresi *et al.*, 2005; He *et al.*, 2014) and  
142 *Rumex crispus* (Hejzman *et al.*, 2012) it has been shown that low nitrate levels in the soil of  
143 the mother plant results in a decrease in germinability of their seeds. Alboresi *et al.* (2005)  
144 reported that nitrate can reduce dormancy in Arabidopsis seeds by either direct effects or  
145 through hormonal and metabolic changes in the seed. These changes probably include  
146 interactions with ABA and/or GA synthesis and degradation pathways (Alboresi *et al.*, 2005).  
147 The effects of maternal environmental conditions on seed quality are not restricted to  
148 germination characteristics of the seeds, but may also include other seed quality traits such as  
149 seed size and seed weight as well as seedling quality characteristics such as root and shoot  
150 weight, hypocotyl length and root architecture. In many species a higher level of nutrient

151 supply to the mother plant led to the production of bigger and heavier seeds (Fenner, 1992).  
152 Moreover, in some species a higher nitrate regime applied to the mother plant resulted in an  
153 enhanced seedling establishment and higher shoot and root weight of the seedlings (Farhadi *et al.*,  
154 *et al.*, 2014; Song *et al.*, 2014). In addition, there are many examples of changed metabolism in  
155 seeds in response to the environmental condition of the mother plant (Joosen *et al.*, 2013;  
156 Mounet *et al.*, 2007). A better understanding of the influence of the maternal environment on  
157 seed and seedling quality can be obtained by performing omics analysis of seeds such as  
158 transcriptomics, proteomics and metabolomics.

159 Fait *et al.* (2006) revealed that seed germination and seedling establishment characteristics are  
160 associated with degradation and mobilization of reserves which are accumulated during seed  
161 maturation like sugars, organic acids and amino acids. Therefore, profiling the metabolites  
162 and finding the ones associated with phenotypes can be regarded as a powerful tool for  
163 monitoring seed performance. In general, metabolite contents alter in response to abiotic  
164 stress, which is most obvious for primary metabolites such as sugars, amino acids and  
165 tricarboxylic acid (TCA) cycle intermediates (Arbona *et al.*, 2013).

166 In this study, we investigated if different maternal nutritional environments can affect the  
167 quality of the progeny of different genotypes. For this purpose we investigated two different  
168 tomato genotypes (*Solanum lycopersicum* cv. Money maker (MM) and *Solanum*  
169 *pimpinellifolium* (PI)) under different nutrient conditions.

170 PI, the most closely related wild tomato species to the advanced tomato breeding line (MM),  
171 has been used in breeding programs for its tolerance to some sub-optimal environments as  
172 well as the ability of being naturally crossed with this species. We grew these genotypes in  
173 different concentrations of nitrate and phosphate. Phosphate is an important nutrient for  
174 plants, making up 0.2% of the dry weight and being an essential part of some vital molecules  
175 like nucleic acids, phospholipids and ATP. Nitrate plays a key role in plants as a major source  
176 of nitrogen and some signal metabolites (Schachtman *et al.*, 1998; Urbanczyk-Wochniak and  
177 Fernie, 2005). Under both optimal and stressful conditions extensive phenotyping by  
178 germination tests and metabolite profiling was done after harvesting the seeds. Based on these  
179 results we show that different levels of phosphate and nitrate available to the mother plant can  
180 influence seed and seedling traits especially under stressful germination conditions. In  
181 addition, in order to investigate if physiological changes in seed and seedling performance are  
182 influenced by metabolic changes in the dry seed, correlation analysis was performed between  
183 physiological traits like seed germination and seedling growth and metabolic changes caused  
184 by the different maternal environments in tomato. We showed that several phenotypic traits

185 are either positively or negatively correlated with metabolites.

186

## 187 **Materials and Methods**

### 188 *Plant material, growth condition and seed extraction*

189 MM and PI plants were grown under standard nutrient conditions (table 1, Supplementary  
190 Table S1) with a 16-h light and 8-h dark photoperiod. The temperature was controlled during  
191 the day and night at 25°C and 15°C, respectively. From first open flower onwards the plants  
192 were transferred to the different nutrient conditions (table 1, Supplementary Table S1). For  
193 each environment four biological replicates were used. All plants were grown in the  
194 greenhouse at Wageningen University, the Netherlands. After harvesting, the seeds were  
195 collected from healthy and ripe fruits. In order to remove the pulp attached to the seeds, they  
196 were treated with 1% hydrochloric acid (HCl) and subsequently passed through a mesh sieve  
197 and washed with water to remove the remaining HCl and pulp. In the following step, seeds  
198 were treated with trisodium phosphate (Na<sub>3</sub>PO<sub>4</sub>·12H<sub>2</sub>O) for disinfection. Finally, seeds were  
199 dried at 20°C for 3 days on a clean filter paper in ambient conditions and stored in the paper  
200 bags at the room temperature (Kazmi *et al.*, 2012).

201

### 202 *Seed phenotyping*

#### 203 *Seed size and weight*

204 Seed size was determined by taking photographs of 12-h imbibed seeds on white filter paper  
205 (20.2 x 14.3 cm) using a Nikon D80 camera fixed to a repro stand with 60 mm objective and  
206 connected to a computer with Nikon camera control pro software version 2.0 (Joosen *et al.*,  
207 2010). The pictures were analysed by ImageJ (<http://rsbweb.nih.gov/ij/>) combining colour  
208 threshold with particle analysis. Seed weight was measured by weighing approximately 100  
209 dry seeds and divided by the number of seeds.

210

#### 211 *Germination assay*

212 Germination assays were performed with four replications of around 50 seeds per sample of  
213 both genotypes in a completely randomized design. The seeds were sown in germination trays  
214 (21x15 cm DBP Plastics, <http://www.dbp.be>) on two blue germination papers (5.6' x 8' Blue  
215 Blotter Paper; Anchor Paper Company, <http://www.seedpaper.com>) and 50 ml demineralized  
216 water in the case of optimal and high temperature germination environments or Sodium  
217 Chloride (-0.5 MPa NaCl; Sigma-Aldrich) and mannitol (-0.5 MPa; Sigma-Aldrich) in the salt  
218 and osmotic stress conditions, respectively. Each germination tray contained three samples,

219 using a special mask to ensure correct placement. The trays were piled up in different piles  
220 with two empty trays on the top and bottom, containing two white filter papers and 15ml of  
221 water and covered by white plastic lids to prevent unequal evaporation and wrapped in a  
222 transparent plastic bag and stored at 4°C for 3 days. Subsequently, the bags were transferred  
223 to an incubator (type 5042; seed processing Holland, <http://www.seedprocessing.nl>) in the  
224 dark at 25°C except for high temperature which was at 35°C. Germination was scored at 24-h  
225 intervals during 14 consecutive days in the case of salt and osmotic stress conditions and at 8-  
226 h intervals for one week for the optimal and high temperature conditions.

227

### 228 ***Seedling phenotyping***

229 Seedling characteristics were measured in two separate experiments. In the first 12 x 12 cm  
230 petri dishes, filled with half MS medium with agar (1%) were used. The top 4 cm of the  
231 medium was removed and the seeds, which were sterilized for 16 h in a desiccator above 100  
232 ml sodium hypochlorite (4%) with 3 ml concentrated HCl, were sown on top of the remaining  
233 8 cm. After sowing the seeds, the plates were stored in the cold room (4°C) for 3 days and  
234 subsequently transferred to a climate chamber and held in a vertical position (70° angle) under  
235 25°C with 16h light and 8h dark. For each plate 14 seeds were used and the first 7 germinated  
236 seeds were kept. Germination was scored during the day at 8-h intervals as visible radical  
237 protrusion. After the start of germination pictures were taken at 24-h intervals for root  
238 architecture analysis. Five days after germination, seedlings were harvested and hypocotyl  
239 length (HypL) was measured. EZ-Rhizo was used to analyse root architecture (Armengaud *et*  
240 *al.*, 2009) and main root length (MRL) and number of lateral roots (NLR) were determined.

241 In the second experiment, 20 seeds of each seed batch were sown in germination trays and  
242 stored for 3 days at 4°C. Afterwards they were transferred to an incubator at 25°C. The first 10  
243 germinated seeds were placed on round blue filter papers (9 cm Blue Blotter Paper; Anchor  
244 Paper Company, <http://www.seedpaper.com>) on a Copenhagen table at 25°C in a randomized  
245 complete block design (with 4 biological replicates) for 10 days. To prevent evaporation,  
246 conical plastic covers with a small hole on top were placed on top of the filter papers. After 10  
247 days, fresh and dry weight of root and shoot of the seedlings was measured (FWR, DWR,  
248 FWSH and DWSH respectively).

249

### 250 ***Nitrate, phosphate and phytate measurement***

251 To determine the nitrate, phosphate and phytate content of the seed samples, 15-20 mg of dry  
252 seeds were frozen in liquid nitrogen and homogenized in a dismembrator (Mikro-



253 dismembrator U; B. Braun Biotech International, Melsungen, Germany), by using 0.6 cm  
254 glass beads, at 2500rpm for 1 minute. Fifteen mg of dry homogenized seeds with 1 ml 0.5 N  
255 HCl and 50 mg l<sup>-1</sup> *trans-aconitate* (internal standard) was incubated at 100°C for 15 minutes.  
256 After centrifugation for 3 minutes at 14000 rpm, the supernatant was filtered using Minisart  
257 SRP4 filters (Sartorius Stedim Biotech, <http://www.sartorius.com>) and transferred to an  
258 HPLC-vial.

259 A Dionex ICS2500 system was used for HPLC-analysis with an AS11-HC column and an  
260 AG11-HC guard column. The elution was performed by 0–15 min linear gradient of 25–100  
261 mM NaOH followed by 15–20 min 500 mM NaOH and 20–35 min 5 mM NaOH with a flow  
262 rate of 1 ml min<sup>-1</sup> throughout the run. Contaminating anions in the samples were removed by  
263 an ion trap column (ATC) which was installed between the pump and the sample injection  
264 valve. Conductivity detection chromatography was performed for anion detection, an ASRS  
265 suppressor was used to reduce background conductivity and water was used as counter flow.  
266 Identification and quantification of peaks was done by using authenticated external standards  
267 of nitrate (NaNO<sub>3</sub>, Merck), phosphate (Na<sub>2</sub>HPO<sub>4</sub>·2H<sub>2</sub>O, Merck) and phytate (Na(12)-IP<sub>6</sub>  
268 IP<sub>6</sub>, Sigma-Aldrich) .

269

#### 270 ***ABA determination***

271 For ABA determination, approximately 15 mg of dry weight seed samples were homogenized  
272 as described above for nitrate, phosphate and phytate extraction and extracted in 1 ml of 10%  
273 methanol/water (v/v) according to Floková et al. (Floková *et al.*, 2014) with modifications.  
274 Stable isotope-labelled internal standard of [2H<sub>6</sub>]-ABA was added to each sample in order to  
275 validate ABA quantification. Sample extracts were centrifuged (13000 rpm/10 min/4°C) and  
276 further purified by solid-phase extraction using Strata X (30 mg/3 cc, Phenomenex) columns,  
277 activated with 1 ml of methanol, water and 1 ml of the extraction solvent. The loaded samples  
278 were washed with 3 ml of water and analyte elution was performed with 3 ml of 80%  
279 methanol/water (v/v). Samples were evaporated to dryness in a Speed-Vac concentrator and  
280 reconstituted in 60 µl of mobile phase prior to the UPLC-MS/MS analysis. The Acquity  
281 UPLC® System (Waters, Milford, MA, USA) coupled to a triple quadrupole mass  
282 spectrometer Xevo™ TQ S (Waters MS Technologies, Manchester, UK) was employed to  
283 measure ABA levels. Samples were injected on a reverse phase based column Acquity  
284 UPLC® CSH™ C18; 2.1 x 100 mm; 1.7 µm (Waters, Ireland) at flow rate 0.4 ml min<sup>-1</sup>.  
285 Separation was achieved at 40°C by 9 min of gradient elution using A) 15 mM formic  
286 acid/water and B) acetonitrile: 0-1 min isocratic elution at 15% B (v/v), a 1-7 min linear

287 gradient to 60% B, 7-9 min linear gradient to 80% B and a 9-10 min logarithmic gradient to  
288 100% B. Finally, the column was washed with 100% acetonitrile and equilibrated to initial  
289 conditions for 2 min. the eluate was introduced to the electrospray ion source of tandem mass  
290 spectrometer operating at the following settings: source/desolvation temperature (120/550°C),  
291 cone/desolvation gas flow (147/650 l h<sup>-1</sup>), capillary voltage (3 kV), cone voltage (30 V),  
292 collision energy (20 eV) and collision gas flow 0.25 ml min<sup>-1</sup>. ABA was quantified in multiple  
293 reaction monitoring mode (MRM) using standard isotope dilution method. The MassLynx™  
294 software (version 4.1, Waters, Milford, MA, USA) was used to control the instrument, MS  
295 data acquisition and processing.

296

### 297 *Analysis of seed metabolites by GC-TOF-MS*

298 For metabolite extraction we used the method as described by Roessner *et al.* (2000) with  
299 small modifications. Approximately 30 tomato seeds were homogenized with a micro  
300 dismembrator (Sartorius) in 2 ml Eppendorf tubes with 2 iron beads (2.5 mm) precooled with  
301 liquid nitrogen and then 10 mg of that material has been used for metabolite extraction.  
302 Metabolite extraction was done by adding 700 µl methanol/chloroform (4:3) together with a  
303 standard (0.2 mg/ml ribitol) to each sample and mixed thoroughly. Samples were sonicated  
304 for 10 minutes and 200 µl Mili-Q water was added, followed by vortexing and centrifugation  
305 (5 min, 13500 rpm). The methanol phase was collected and transferred to a new 2 ml  
306 Eppendorf tube. Five hundred µl methanol/chloroform was added to the remaining organic  
307 phase, kept on ice for 10 min followed by adding 200 µl Mili-Q water. After vortexing and  
308 centrifugation (5 min, 13500 rpm), the methanol phase was collected and added to the  
309 previous collected phase. Finally, 100 µl of total extract was transferred to a glass vial and  
310 dried overnight in a speedvac centrifuge at 35°C (Savant SPD1211).

311 For each maternal environment four biological replicates were used and the gas  
312 chromatography-time of flight-mass spectrometry (GC-TOF-MS) method was used for  
313 metabolite analysis which was previously described by Carreno-Quintero *et al.* (2012).  
314 Detector voltage was set at 1600 V. The chromaTOF software 2.0 (Leco instruments) was  
315 used for analysing the raw data and further processing for extracting and aligning the mass  
316 signals was performed using the Metalign software (Lommen, 2009). A signal to noise ratio  
317 of 2 was used. Afterwards, the output was further analysed using the Metalign output  
318 Transformer (METOT; Plant Research International, Wageningen) and Centrotypes were  
319 constructed using MSClust (Tikunov *et al.*, 2012). The identification of Centrotypes was  
320 performed by matching the mass spectra to an in-house-constructed library, to the GOLM

321 metabolome database (<http://gmd.mpimp-golm.mpg.de/>) and to the NIST05 library (National  
322 Institute of Standards and Technology, Gaithersburg, MD, USA;  
323 <http://www.nist.gov/srd/mslist.htm>). The identification was based on similarity of spectra and  
324 comparison of retention indices calculated using a 3<sup>th</sup> order polynomial function (Strehmel *et*  
325 *al.*, 2008).

326

### 327 *Statistical analysis*

#### 328 *Calculation of $G_{max}$ , $t_{50}^{-1}$ , AUC and $U_{8416}$*

329 Seed performance was determined by calculating maximum germination ( $G_{max}$ , %), rate of  
330 germination or the reciprocal of time to reach 50% of germination ( $t_{50}^{-1}$ ), uniformity of  
331 germination or time from 16% till 84% germination ( $U_{8416}$ , h) and area under the germination  
332 curve (AUC, during the first 100 and 200h for optimal and high temperature respectively and  
333 300h in the case of salt and mannitol stress conditions) using the curve-fitting module of the  
334 Germinator package (Joosen *et al.*, 2010, Ligterink and Hilhorst, 2017).

335

#### 336 *Analysis of all factors affecting seed and seedling traits: Genotype, Environments and* 337 *Genotype by environment interactions ( $G \times E$ )*

338 To identify the factors correlating with seed and seedling traits we used an ANOVA (with  
339 linear model trait ~ genotype \* treatment). The different treatment regimens (N and P) where  
340 studied separately. A significance threshold of 0.05 was used.

341

#### 342 *Cluster, principle component analysis and correlation analysis*

343 Cluster and principle component analysis (PCA) were performed using the online web tool  
344 MetaboAnalyst 3.0; [www.metaboanalyst.ca](http://www.metaboanalyst.ca) (Xia *et al.*, 2015).

345 R-packages “MASS”, “Hmisc”, “VGAM”, “gplots” and “graphics” ([https://www.r-](https://www.r-project.org/)  
346 [project.org/](https://www.r-project.org/)) were used for analysis and construction of the correlation between measured  
347 traits.

348

## 349 **Results**

350 Several studies have been reported recently about the effect of the maternal environment such  
351 as temperature, light and nutrition on seed and seedling quality in plants (Alboresi *et al.*,  
352 2005; He *et al.*, 2014; Hejzman *et al.*, 2012). However there is still a lack of knowledge on the  
353 influence of nutritional condition of the mother plant on seed and seedling performance. In  
354 order to investigate the effect of maternal nutrient environment on the seed and seedling

355 quality in tomato, two tomato genotypes, MM and PI were grown on different nutrient  
356 solutions from flowering onwards (Table 1). Their seeds were harvested and phenotyped for  
357 various seed performance traits, including percentage of germination, germination rate and  
358 uniformity, under optimal and several stress germination conditions (i.e. high temperature,  
359 salt and osmotic stress). Furthermore, seed size and weight were determined. Since final  
360 successful and sustainable crop production results from healthy seedlings and good seedling  
361 establishment, we also measured some seedling quality traits such as hypocotyl length, root  
362 architecture and fresh and dry root and shoot weight.

363

#### 364 ***Factors affecting seed and seedling traits***

365 A linear model/ANOVA was used to investigate the effects caused by the different factors  
366 like genotype, environment and their interaction (G×E). The results showed that genotype was  
367 an important factor, since it had a very pronounced influence on almost all traits in different  
368 nitrate and phosphate concentrations (Table 2). Also the environment under which seeds  
369 developed had a significant effect which was most prominent for different nitrate conditions  
370 (Table 2). Although G×E interactions had a significant effect on some traits for the phosphate  
371 environment, most of the seed and seedling traits in the case of different nitrate concentrations  
372 were significantly influenced by G×E interactions (Table 2).

373

#### 374 ***The effect of different nutrient regimes of the mother plant on seed quality traits***

##### 375 *Seed germination under optimal conditions (water)*

376 Under normal germination conditions only very low nitrate (0 mM) decreased the germination  
377 percentage in MM (Fig. 1A). Although the rate of the germination ( $t_{50}^{-1}$ ) was not affected  
378 significantly by different amounts of nitrate, it was decreased by higher amounts of phosphate  
379 (Supplementary Fig. S1A).

380

##### 381 *Seed germination in stress conditions (high temperature, salt and mannitol)*

382 Our results showed that at high temperature MM seeds from plants grown in 0 mM nitrate,  
383 germinated very poorly (4%) while higher concentrations of nitrate resulted in significantly  
384 higher germination percentages (40-60%; Fig. 1B). These seeds also had a higher  $t_{50}^{-1}$  (Fig.  
385 1C). In contrast with nitrate,  $G_{\max}$  was decreased at higher levels of phosphate (Fig. 1B).

386 While seed germination of MM was positively correlated with nitrate concentration in  
387 mannitol (Fig. 1D), germination rate was contrarily decreased at higher levels of both  
388 nutrients (Supplementary Fig. S1B). Under salt stress, both phosphate and nitrate had a

389 positive effect on germination percentage of MM seeds and a negative effect on their  
390 germination rate (lower  $t_{50}^{-1}$  values, Fig. 1E, F).

391 Although different nutritional environments resulted in clear changes in seed quality traits in  
392 MM, hardly any effect was seen for PI seeds, indicating that PI was tolerant to the different  
393 environments that were tested.

394

#### 395 *Seed size and weight*

396 By increasing the nitrate level, seed size and weight of MM plants increased. However, both  
397 seed size and weight decreased slightly again at concentrations of 20 mM nitrate or higher.  
398 For PI, higher amounts of nitrate and phosphate led to the production of larger and heavier  
399 seeds (Fig. 2A,B).

400

#### 401 *ABA, nitrate and phytate*

402 ABA content of dry seeds was not significantly influenced by the maternal nitrate  
403 concentration, but was increased by application of 1 mM of phosphate. Although ABA  
404 showed a relatively consistent increase in PI, concentrations above 1 mM of phosphate  
405 resulted in decreased ABA levels in MM seeds (Supplementary Fig. S2A). The phytate  
406 content of the seeds significantly increased with higher phosphate levels in both genotypes  
407 (Supplementary Fig. S2B). Application of nitrate up to 14 mM increased phytate levels of  
408 MM seeds. However, concentrations above 14 mM led to decreased phytate levels in both  
409 genotypes (Supplementary Fig. S2B). In PI seeds nitrate content was not affected by the  
410 nutrient nitrate level, while in MM higher levels of nitrate surprisingly led to lower seed  
411 nitrate levels.

412

#### 413 *The effects of different nutrient regimes of the mother plant on seedling quality traits*

##### 414 *Fresh and dry shoot and root weight*

415 Both FWR and FWSH of seedlings were influenced by different concentrations of nitrate and  
416 phosphate for the mother plant. Evidently, raising the dosage of nitrate and phosphate in both  
417 MM and PI resulted in heavier seedlings (shoot and root) (Fig. 3A, B). Shoot and root dry  
418 weight followed the same pattern as that of the fresh weight in different environments in both  
419 lines (Supplementary Fig. S3A, B).

420

##### 421 *Root architecture*

422 Although higher amounts of nitrate and phosphate produced a lower NLR in PI, MRL of these  
423 plants were not remarkably influenced by different nutritional environments (Fig. 3C, D). In  
424 contrast, MM plants grown in higher regimes of nitrate and phosphate produced seedlings  
425 with longer main roots and a higher NLR (Fig. 3C, D). Hypocotyl length of the seedlings was  
426 not influenced significantly by the maternal environment (Supplementary Fig. S3C).

427

#### 428 ***Trait by trait correlation***

429 In order to investigate how different maternal nutrient environments affected different seed  
430 and seedling characteristics in a similar way, a correlation analysis was performed for all pairs  
431 of measured traits for either different concentrations of nitrate or phosphate, separately (Fig.  
432 4, Supplementary Table S1). For the nitrate environment, nitrate levels were positively  
433 correlated with seed and seedling performance traits such as seed size, seed weight and  
434 FWSH and FWR, however nitrate content of the seeds was negatively correlated with nutrient  
435 nitrate levels (Fig. 4). ABA levels had a negative correlation with almost all the measured  
436 phenotypes as also has been observed for *A. thaliana* (He *et al.*, 2016). For the phosphate  
437 environment, seed size, seed weight, germination in mannitol and salt, FWR, FWSH and  
438 phytate content were strongly correlated with phosphate levels. Moreover seed size and seed  
439 weight also showed a strong positive correlation with FWR and FWSH of seedlings for the  
440 different phosphate environments (Fig. 4).

441

#### 442 ***Metabolite analysis***

443 Nutritional environments of the mother plant affected seed and seedling performance traits.  
444 Since the metabolites in the dry seeds have been built up during seed maturation and drying,  
445 the underlying metabolic pathways have been analysed using a metabolomics approach to see  
446 if the observed differences in phenotype can be explained by different metabolic content of  
447 the mature dry seeds. Dry mature seeds from plants grown in the different nutritional  
448 environments have been used for metabolic analysis as it gives a broad overview of the  
449 biochemical status of the seeds and helps to better understand the responses to the different  
450 environments. This resulted in the detection of 89 primary metabolites from which 50 could  
451 be identified. These could be classified as amino acids, organic acids, sugars and some other  
452 metabolites which are intermediates of key metabolic compounds (Supplementary Excel File  
453 S1). MM plants grown with 0 mM nitrate produced less seeds which have been used for the  
454 germination assays and therefore, metabolites of these seeds could not be measured in this  
455 study.

456

457 *Genetic effects on metabolite profiles*

458 Both PCA and cluster analysis of the metabolites showed that metabolite content was mainly  
459 affected by the genetic background of the seeds. A clear separation between samples of the  
460 two genotypes in terms of known metabolites was observed in a PCA plot which indicated  
461 that the metabolic variation caused by genetic background was larger than the variation  
462 caused by the maternal environment (Fig. 5). The dendrogram which was created by cluster  
463 analysis revealed an obvious segregation between the two genotypes which is already shown  
464 by PCA analysis. There are three main clusters for each genotype in which P-Control, P-5P,  
465 P-10P and P-2.4N; P-20N and P-36N; and P-0P, P-0.1P and P-0N were grouped together  
466 (Supplementary Fig. S4). Different environments were clustered with an almost identical  
467 pattern for MM seeds (Supplementary Fig. S4).

468

469 *Metabolic changes in response to the maternal nutrient levels*

470 From the 50 identified metabolites, 46 were successfully mapped to their representative  
471 pathways with help of Mapman (<http://MapMan.gabipd.org>) and this was used to generate a  
472 metabolic framework (Fig. 6). Changing metabolite contents within the genotypes and  
473 different nutritional environments are displayed as heatmap plots below the metabolites which  
474 significantly changed in response to at least one environmental factor (Fig. 6). In general,  
475 contents of nitrogen-metabolism related metabolites such as amino acids (asparagine, alanine  
476 and  $\gamma$ -aminobutyric acid (GABA)) and urea were decreased significantly in seeds from plants  
477 grown under lower amounts of nitrate for both genotypes. The GABA content of MM seeds  
478 was decreased at higher levels of phosphate while it was increased at higher nitrate levels.  
479 Galactarate and pyroglutamate which both are precursors of glutamate were also increased by  
480 higher amounts of nitrate. Furthermore, some of the glycolysis and TCA cycle intermediates  
481 were remarkably affected by the maternal environment. Fructose-6-phosphate (F6P), which is  
482 one of the derivatives of glucose in the glycolytic pathway, was reduced by higher phosphate  
483 levels. Citrate and malate are two TCA intermediates which were negatively influenced by  
484 increasing phosphate levels (Fig. 6).

485

486 *Correlation of seed and seedling quality traits with metabolites*

487 A correlation analysis was performed to find correlations between metabolic changes and  
488 seed and seedling performance. In the 9 plots of Figure 7 each plot represents the correlation  
489 of metabolites with one specific trait shown in four rows (MM and PI in nitrate and MM and

490 PI in phosphate). Correlation analysis showed that there are some traits which have similar  
491 correlation patterns for all four conditions. For example, phytate content is positively  
492 correlated with germination characteristics under saline conditions such as  $G_{max}$  and  $t_{50}$  for  
493 both environmental factors in both genotypes. Furthermore there is a negative correlation of  
494 GABA and gluconate with seed size and seed weight in all four cases. There is also a positive  
495 relationship between allantoin and FWR and FWSH in all four cases (Fig. 7).

496 The correlation plots also indicated that some correlations were specific for either nitrate or  
497 phosphate environments. For seeds from plants grown in different phosphate environments,  
498 seed size and weight, FWR, FWSH and MRL of both genotypes displayed a negative  
499 correlation with some TCA cycle intermediates such as citrate, malate and malonate and  
500 positive correlation with phytate. Additionally, some correlations showed contrasting trends  
501 for the two environmental factors, such as the positive correlation of seed size and weight  
502 with citrate for seed batches originating from different maternal nitrate levels while they were  
503 negatively correlated in case of different phosphate levels (Fig. 7).

504 There are multiple correlations which were only present for a single condition. For instance in  
505 MM plants which were grown in different concentrations of nitrate, FWR and FWSH was  
506 positively correlated with a majority of the amino acids. In the same plants, seed germination  
507 quality traits under stressful conditions like salt, high temperature and osmotic stress were  
508 positively correlated with most amino acids and sugars (Fig. 7).

509

## 510 **Discussion**

511 Although there are many reports addressing effects of the maternal environment on seed and  
512 seedling quality traits in several species, the effect of the maternal nutritional condition on  
513 seed performance has rarely been studied. In general, studying the effects of the maternal  
514 environment on seed performance may give insight into the processes that are involved in the  
515 adaptability of plants. The influence of the maternal environment on the next generation may  
516 be determined by several physiological traits such as germinability, size and weight of the  
517 seeds, as well as metabolic traits such as amino acid and sugar content of the seeds. Several  
518 studies have shown how the maternal environment affects seed and seedling quality in  
519 different crops. There are report on the effect of maternal photoperiod, temperature and  
520 nutrient conditions on seed performance (Demir *et al.*, 2004; Donohue, 2009; Munir *et al.*,  
521 2001; Schmutz *et al.*, 2006). The influence of maternal nutrient conditions have been studied  
522 in different species such as tomato and Arabidopsis. It appeared that different dosages of  
523 maternal nutrients may influence seed characteristics such as seed size, seed weight and seed



524 dormancy (Alboresi *et al.*, 2005; He *et al.*, 2014; Varis and George, 1985; Wulff, 1986). We  
525 here report the effect of a maternal environment with different concentrations of nitrate and  
526 phosphate on seed and seedling quality of two tomato genotypes. Additionally, we assessed  
527 primary metabolite profiles and analysed their correlation with different physiological traits  
528 such as seed germination and seedling development.

529

### 530 ***Genotype by environment interactions (G×E)***

531 We used two different genotypes to see how the nutritional maternal environment may  
532 influence seed and seedling quality traits and what is the effect of G×E interactions. We  
533 observed that the genotype is profoundly affecting seed and seedling characteristics and, thus,  
534 an obvious genotype specific effect was found for some phenotypic traits such as germination  
535 at high temperature ( $G_{\max}$  HT) and metabolite content such as GABA (Table 2, Fig. 8). For  
536 the future, studying more *S. lycopersicum* genotypes may provide a more robust conclusion  
537 on the effect of the genotype. For phenotypic traits such as seed size and seed weight, there is  
538 a difference between the two genotypes, but there is no genotype specific effect since both  
539 genotypes are significantly influenced by nitrate and phosphate concentration (Fig. 8). MM  
540 and PI showed almost the same trend for traits such as seed size, seed weight, FWR, FWSH,  
541 DWR, DWSH and also MRL of the seedlings. However, MM plants produced generally  
542 bigger and heavier seeds and seedlings in all nutritional maternal environments (Fig. 2, Fig.  
543 3). Furthermore, the highly significant influence of G×E interactions on several seed and  
544 seedling performance traits (Table 2) indicates that the phenotypic plasticity of the traits  
545 varied in relation to the different nutritional environments. In general, phosphate showed less  
546 effect than nitrate and among the nitrate levels, the traits were mostly influenced by 0N which  
547 could be an indication of the saturation of the nitrate response at the higher dosages in most of  
548 the traits (He *et al.*, 2014).

549

### 550 ***Relation between the nutritional environments of the mother plant and seed germination***

551 There was also variability in the germination response of MM seeds from plants grown on  
552 different nitrate levels. Seeds that developed on higher levels of nitrate germinated better  
553 under stressful conditions, such as osmotic, salt and high temperature. These seeds also  
554 contained higher contents of amino acids. Several studies have implied that in response to  
555 stressful conditions, amino acids can be fed into the TCA cycle and serve as the main  
556 substrate for energy generation. This might explain higher seed germination percentages  
557 under stress conditions (Galili, 2011). Although different concentrations of nitrate and

558 phosphate altered seed germination percentages under stressful conditions in MM, there was  
559 no significant change of seed germination in PI since PI showed almost 100% germination  
560 under optimal and the tested stressful germination conditions. PI is a wild tomato species and  
561 is often more tolerant to various biotic and abiotic stresses (Kazmi *et al.*, 2012; Kumar, 2006;  
562 Rao *et al.*, 2013; Rodríguez-López *et al.*, 2011). Loss of abiotic stress tolerance in tomato  
563 cultivars is thought to be the result of genetic bottlenecks during domestication (Bai and  
564 Lindhout, 2007; Doebley *et al.*, 2006).

565

566 ***Seed size and seedling growth are strongly influenced by the maternal nutritional***  
567 ***environment***

568 As described above, it appears that for both genotypes increasing the nitrate level leads to  
569 higher amounts of amino acids in the seeds. Furthermore, proteins are one of the principal  
570 storage compounds of seeds that are subsequently used as nutrients and energy source to  
571 assert seed germination and seedling establishment (Bewley *et al.*, 2012; Galili *et al.*, 2015).  
572 Thus, the higher dosage of nitrate may result in the synthesis of more amino acids during  
573 development and this might increase protein content which subsequently might result in  
574 bigger and heavier seed and seedling production and eventually successful establishment of  
575 seedlings (Castro *et al.*, 2006; Ellis, 1992). Seedling vigour and establishment are two  
576 essential parameters that may influence final crop yield and are therefore necessary for  
577 profitable crop production. Successful seedling establishment can be considered as the most  
578 critical stage of crop development. Such an important stage can be influenced by parameters  
579 such as the maternal environment in which the seeds mature and several seed characteristics  
580 such as seed size, seed weight and stored organic and mineral nutrients in the produced seeds  
581 (Lamont and Groom, 2013; Stevens *et al.*, 2014). Confirming a study by Khan *et al.* (2012),  
582 we show that seedling size in tomato is positively correlated with seed size and weight in both  
583 genotypes. The positive correlation that we found between seed and seedling size is also in  
584 agreement with several other studies (Cornelissen, 1999; Greene and Johnson, 1998; Khan *et al.*,  
585 2012). Additionally, we have shown that increasing the maternal phosphate level  
586 enhanced seed size and seed weight which again resulted in increased seedling size. We  
587 observed that higher amounts of phosphate decreased the amount of F6P in seeds. Moreover,  
588 the level of citrate and malate in the seeds decreased with increasing maternal phosphate  
589 levels. Since glycolysis and the TCA cycle are key metabolic pathways by which organisms  
590 generate energy, decrease in the level of intermediates of these pathways like F6P, citrate and  
591 malate possibly indicates their consumption for energy production. It might suggest that

592 higher utilization of glycolytic and TCA intermediates in seeds of higher maternal phosphate  
593 concentrations, results in more production of ATP and consequently more growth of the  
594 seedlings (Fig. 3, Fig. 6). In addition, production of bigger and heavier seedling for seeds  
595 developed under higher dosage of phosphate may be related to the higher amount of reserves  
596 which could be stored in bigger tomato seeds produced under the same condition.

597

### 598 ***Role of GABA in plant adaptation***

599 Carbon (C) and nitrogen (N) are two vital factors that help plants to execute essential cellular  
600 activities. C and N metabolic pathways are strongly coordinated to ensure optimal growth and  
601 development in plants (Zheng, 2009). Several studies have reported that when plants are  
602 facing N deficiency, photosynthetic output and, consequently, plant growth is negatively  
603 influenced (Coruzzi and Bush, 2001; Coruzzi and Zhou, 2001). Several studies have  
604 implicated a primary role of the GABA shunt in the central C/N metabolism (Fait *et al.*,  
605 2011). In this study we found that the application of lower amounts of nitrate to mother plants  
606 resulted in lower production of GABA in the seeds of the progeny. Therefore, the decrease in  
607 GABA content in dry seeds as a result of maternal N deficiency could be an indication of  
608 GABA usage to alleviate N shortage and, subsequently, to recover the C/N balance (He *et al.*,  
609 2016).

610 In this study, we observed the highest percentage of seed germination under high temperature  
611 conditions in seeds that had developed in high levels of nitrate and/or low levels of phosphate  
612 (Fig. 1). On the other hand, although enhancing the maternal nitrate level results in an  
613 increase in the GABA content of the seeds of MM, enhancing the phosphate levels conversely  
614 decreased it (Fig. 6). Thus, there is a good correlation for MM seeds between the different  
615 GABA levels in the seeds as a result of the maternal environment and the ability to germinate  
616 at high temperatures. This is in agreement with many studies in which GABA has been shown  
617 to act as an abiotic stress mitigating component in plants (Bouche and Fromm, 2004;  
618 Kinnersley and Turano, 2000).

619 In this study we observed that different dosages of nitrate and phosphate during seed  
620 development and maturation may influence the seed and seedling characteristics. We have  
621 shown that in tomato, nitrate has a greater effect on seed and seedling performance as  
622 compared with phosphate. However, two different tomato genotypes showed different  
623 responses to the maternal environment and sometimes genetic specific responses were  
624 observed for some traits. Such differential responses may indicate the contribution of different  
625 genetic and molecular pathways to the phenotypic adaptation. Further investigating such

626 observations as well as the effect of G×E interaction on the performance of the tomato seed  
627 and seedling may ultimately help in predicting and improving seed and seedling quality by  
628 controlling production environments and breeding programs.

629

### 630 **Supplementary data**

631 **Table S1.** List of the nutrient solutions with their concentrations used for different growing  
632 environments of tomato plants.

633 **Supplementary Excel File S1.** Detected metabolites in the seeds of two tomato genotypes  
634 (**MM** and **PI**) grown in different concentration of nitrate and phosphate.

635 **Figure S1.** Effects of maternal nutritional environments on seed germination traits of both  
636 **MM** and **PI**.

637 **Figure S2.** Effects of maternal nutritional environments on ABA (**A**) and Phytate (**B**) content  
638 of both **MM** and **PI** seeds developed in different concentrations of nitrate and phosphate.

639 **Figure S3.** Effects of maternal nutritional environments on seedling quality traits of both **MM**  
640 and **PI**.

641 **Figure S4.** Cluster analysis of known primary metabolites in **MM** and **PI** seeds in response to  
642 different concentration of nitrate and phosphate during maternal growth.

643

### 644 **Acknowledgments**

645 This work was supported by Technology Foundation (STW), which is part of the Netherlands  
646 Organization for Scientific Research (NWO) (NG, LW, WL) and by the Iranian Ministry of  
647 Science, Research and Technology (SS).

648

## References

- Alboresi A, Gestin C, Leydecker MT, Bedu M, Meyer C, Truong HN.** 2005. Nitrate, a signal relieving seed dormancy in Arabidopsis. *Plant Cell Environment* **28**, 500-512.
- Arbona V, Manzi M, Ollas Cd, Gómez-Cadenas A.** 2013. Metabolomics as a tool to investigate abiotic stress tolerance in plants. *International journal of molecular sciences* **14**, 4885-4911.
- Armengaud P, Zambaux K, Hills A, Sulpice R, Pattison RJ, Blatt MR, Amtmann A.** 2009. EZ-Rhizo: integrated software for the fast and accurate measurement of root system architecture. *The Plant Journal* **57**, 945-956.
- Bai Y, Lindhout P.** 2007. Domestication and breeding of tomatoes: what have we gained and what can we gain in the future? *Annals of botany* **100**, 1085-1094.
- Bewley JD, Bradford K, Hilhorst H.** 2012. *Seeds: physiology of development, germination and dormancy*: Springer Science & Business Media.
- Bouche N, Fromm H.** 2004. GABA in plants: just a metabolite? *Trends in plant science* **9**, 110-115.
- Carreno-Quintero N, Acharjee A, Maliepaard C, Bachem CW, Mumm R, Bouwmeester H, Visser RG, Keurentjes JJ.** 2012. Untargeted metabolic quantitative trait loci analyses reveal a relationship between primary metabolism and potato tuber quality. *Plant physiology* **158**, 1306-1318.
- Castro J, Hódar JA, Gómez JM.** 2006. Seed size. *Handbook of Seed Science and Technology*. Food Products Press, Binghamton, NY, 397-427.
- Cornelissen J.** 1999. A triangular relationship between leaf size and seed size among woody species: allometry, ontogeny, ecology and taxonomy. *Oecologia* **118**, 248-255.
- Coruzzi G, Bush DR.** 2001. Nitrogen and carbon nutrient and metabolite signaling in plants. *Plant Physiology* **125**, 61-64.
- Coruzzi GM, Zhou L.** 2001. Carbon and nitrogen sensing and signaling in plants: emerging 'matrix effects'. *Current opinion in plant biology* **4**, 247-253.
- Delouche J, Baskin C.** 1971. Determinants of seed quality. *SHORT COURSE FOR SEEDSMEN* **14**, 53-68.
- Delouche JC.** 1980. Environmental effects on seed development and seed quality. *HortScience* **15**, 775-780.
- Demir I, Mavi K, Oztokat C.** 2004. Changes in germination and potential longevity of watermelon (*Citrullus lanatus*) seeds during development. *New Zealand Journal of Crop and Horticultural Science* **32**, 139-145.

- Doebley JF, Gaut BS, Smith BD.** 2006. The molecular genetics of crop domestication. *Cell* **127**, 1309-1321.
- Donohue K.** 2009. Completing the cycle: maternal effects as the missing link in plant life histories. *Philosophical Transactions of the Royal Society of London B: Biological Sciences* **364**, 1059-1074.
- Ellis R.** 1992. Seed and seedling vigour in relation to crop growth and yield. *Plant Growth Regulation* **11**, 249-255.
- Fait A, Angelovici R, Less H, Ohad I, Urbanczyk-Wochniak E, Fernie AR, Galili G.** 2006. Arabidopsis seed development and germination is associated with temporally distinct metabolic switches. *Plant physiology* **142**, 839-854.
- Fait A, Nesi AN, Angelovici R, Lehmann M, Pham PA, Song L, Haslam RP, Napier JA, Galili G, Fernie AR.** 2011. Targeted enhancement of glutamate-to- $\gamma$ -aminobutyrate conversion in Arabidopsis seeds affects carbon-nitrogen balance and storage reserves in a development-dependent manner. *Plant physiology* **157**, 1026-1042.
- Farhadi E, Daneshyan J, Hamidi A, Rad AS, Valadabadi H.** 2014. Effects of parent plant nutrition with different amounts of nitrogen and irrigation on seed vigor and some characteristics associated with hybrid 704 in Kermanshah region. *Journal of Novel Applied Sciences* **3**, 551-556.
- Fenner M.** 1991. The effects of the parent environment on seed germinability. *Seed Science Research* **1**, 75-84.
- Fenner M.** 1992. Environmental influences on seed size and composition. *Horticultural reviews* **13**, 183-213.
- Floková K, Tarkowská D, Miersch O, Strnad M, Wasternack C, Novák O.** 2014. UHPLC–MS/MS based target profiling of stress-induced phytohormones. *Phytochemistry* **105**, 147-157.
- Galili G.** 2011. The aspartate-family pathway of plants: linking production of essential amino acids with energy and stress regulation. *Plant Signaling & Behavior* **6**, 192-195.
- Galili G, Avin-Wittenberg T, Angelovici R, Fernie AR.** 2015. The role of photosynthesis and amino acid metabolism in the energy status during seed development. *Advances in Seed Biology*, 99.
- Greene D, Johnson E.** 1998. Seed mass and early survivorship of tree species in upland clearings and shelterwoods. *Canadian Journal of Forest Research* **28**, 1307-1316.
- He H, de Souza Vidigal D, Snoek LB, Schnabel S, Nijveen H, Hilhorst H, Bentsink L.** 2014. Interaction between parental environment and genotype affects plant and seed

performance in Arabidopsis. *Journal of experimental botany* **65**, 6603-6615.

**He H, Willems LA, Batushansky A, Fait A, Hanson J, Nijveen H, Hilhorst HW, Bentsink L.** 2016. Effects of parental temperature and nitrate on seed performance are reflected by partly overlapping genetic and metabolic pathways. *Plant and Cell Physiology* **57**, 473-487.

**Hejzman M, Křišťálová V, Červená K, Hrdličková J, Pavlů V.** 2012. Effect of nitrogen, phosphorus and potassium availability on mother plant size, seed production and germination ability of *Rumex crispus*. *Weed Research* **52**, 260-268.

**Hilhorst HW, Karssen CM.** 1988. Dual effect of light on the gibberellin- and nitrate-stimulated seed germination of *Sisymbrium officinale* and *Arabidopsis thaliana*. *Plant physiology* **86**, 591-597.

**Joosen RV, Kodde J, Willems LA, Ligterink W, van der Plas LH, Hilhorst HW.** 2010. germinator: a software package for high-throughput scoring and curve fitting of Arabidopsis seed germination. *The Plant Journal* **62**, 148-159.

**Joosen RVL, Arends D, Li Y, Willems LA, Keurentjes JJ, Ligterink W, Jansen RC, Hilhorst HW.** 2013. Identifying genotype-by-environment interactions in the metabolism of germinating Arabidopsis seeds using generalized genetical genomics. *Plant physiology* **162**, 553-566.

**Kazmi RH, Khan N, Willems LA, Van Heusden AW, Ligterink W, Hilhorst HW.** 2012. Complex genetics controls natural variation among seed quality phenotypes in a recombinant inbred population of an interspecific cross between *Solanum lycopersicum* × *Solanum pimpinellifolium*. *Plant, cell & environment* **35**, 929-951.

**Khan N, Kazmi RH, Willems LA, Van Heusden AW, Ligterink W, Hilhorst HW.** 2012. Exploring the natural variation for seedling traits and their link with seed dimensions in tomato. *PLoS One* **7**, e43991.

**Kinnersley AM, Turano FJ.** 2000. Gamma aminobutyric acid (GABA) and plant responses to stress. *Critical Reviews in Plant Sciences* **19**, 479-509.

**Kumar N.** 2006. *Breeding of horticultural crops: principles and practices*: New India Publishing.

**Lamont BB, Groom PK.** 2013. Seeds as a source of carbon, nitrogen, and phosphorus for seedling establishment in temperate regions: a synthesis. *American Journal of Plant Sciences* **4**, 30-40.

**Ligterink W, Hilhorst HWM.** 2017. High throughput scoring of seed germination. *Plant Hormones: Methods and Protocols. Series: Methods in Molecular Biology, Vol. 1497 (J. Kleine-Vehn and M. Sauer, eds.)* Springer, New York, 57-72.

- Lommen A.** 2009. MetAlign: Interface-Driven, Versatile Metabolomics Tool for Hyphenated Full-Scan Mass Spectrometry Data Preprocessing. *Analytical Chemistry* **81**, 3079-3086.
- Mounet F, Lemaire-Chamley M, Maucourt M, Cabasson C, Giraudel J-L, Deborde C, Lessire R, Gallusci P, Bertrand A, Gaudillère M.** 2007. Quantitative metabolic profiles of tomato flesh and seeds during fruit development: complementary analysis with ANN and PCA. *Metabolomics* **3**, 273-288.
- Munir J, Dorn L, Donohue K, Schmitt J.** 2001. The influence of maternal photoperiod on germination requirements in *Arabidopsis thaliana*. *American Journal of Botany* **88**, 1240-1249.
- Pourrat Y, Jacques R.** 1975. The influence of photoperiodic conditions received by the mother plant on morphological and physiological characteristics of *Chenopodium polyspermum* L. seeds. *Plant Science Letters* **4**, 273-279.
- Rao ES, Kadirvel P, Symonds RC, Ebert AW.** 2013. Relationship between survival and yield related traits in *Solanum pimpinellifolium* under salt stress. *Euphytica* **190**, 215-228.
- Rodríguez-López M, Garzo E, Bonani J, Fereres A, Fernández-Muñoz R, Moriones E.** 2011. Whitefly resistance traits derived from the wild tomato *Solanum pimpinellifolium* affect the preference and feeding behavior of *Bemisia tabaci* and reduce the spread of Tomato yellow leaf curl virus. *Phytopathology* **101**, 1191-1201.
- Roessner U, Wagner C, Kopka J, Trethewey RN, Willmitzer L.** 2000. Simultaneous analysis of metabolites in potato tuber by gas chromatography–mass spectrometry. *The Plant Journal* **23**, 131-142.
- Rowse H, Finch-Savage W.** 2003. Hydrothermal threshold models can describe the germination response of carrot (*Daucus carota*) and onion (*Allium cepa*) seed populations across both sub- and supra-optimal temperatures. *New Phytologist* **158**, 101-108.
- Schachtman DP, Reid RJ, Ayling SM.** 1998. Phosphorus uptake by plants: from soil to cell. *Plant physiology* **116**, 447-453.
- Schmuths H, Bachmann K, Weber WE, Horres R, Hoffmann MH.** 2006. Effects of preconditioning and temperature during germination of 73 natural accessions of *Arabidopsis thaliana*. *Annals of Botany* **97**, 623-634.
- Song J, Zhou J, Zhao W, Xu H, Wang F, Xu Y, Wang L, Tian C.** 2014. Effects of salinity and nitrate on production and germination of dimorphic seeds applied both through the mother plant and exogenously during germination in *Suaeda salsa*. *Plant Species Biology* **31**, 19–28.
- Sperling L, Osborn TC, Cooper HD.** 2004. *Towards effective and sustainable seed relief*



*activities: report of the Workshop on Effective and Sustainable Seed Relief Activities, Rome, 26-28 May 2003*: Food & Agriculture Org.

**Stevens N, Seal CE, Archibald S, Bond W.** 2014. Increasing temperatures can improve seedling establishment in arid-adapted savanna trees. *Oecologia* **175**, 1029-1040.

**Strehmel N, Hummel J, Erban A, Strassburg K, Kopka J.** 2008. Retention index thresholds for compound matching in GC–MS metabolite profiling. *Journal of Chromatography B* **871**, 182-190.

**Thomas JF, Raper CD.** 1979. Germinability of tobacco seed as affected by culture of the mother plant. *Agronomy Journal* **71**, 694-695.

**Tikunov Y, Laptinok S, Hall R, Bovy A, De Vos R.** 2012. MSClust: a tool for unsupervised mass spectra extraction of chromatography-mass spectrometry ion-wise aligned data. *Metabolomics* **8**, 714-718.

**Urbanczyk-Wochniak E, Fernie AR.** 2005. Metabolic profiling reveals altered nitrogen nutrient regimes have diverse effects on the metabolism of hydroponically-grown tomato (*Solanum lycopersicum*) plants. *Journal of Experimental Botany* **56**, 309-321.

**Varis S, George R.** 1985. Influence of mineral nutrition on fruit yield, seed yield and quality in tomato. *Journal of horticultural science* **60**, 373-376.

**Wulff RD.** 1986. Seed size variation in *Desmodium paniculatum*: I. Factors affecting seed size. *The Journal of Ecology* **74**, 87-97.

**Xia J, Sinelnikov IV, Han B, Wishart DS.** 2015. MetaboAnalyst 3.0—making metabolomics more meaningful. *Nucleic acids research* **43**, W251-W257.

**Zheng Z-L.** 2009. Carbon and nitrogen nutrient balance signaling in plants. *Plant Signaling & Behavior* **4**, 584-591.

**Table 1.** Nutrient conditions of mother plants after flowering.

| <b>Maternal Environment</b> | <b>Nitrate</b> | <b>Phosphate</b> |
|-----------------------------|----------------|------------------|
| <b>Standard</b>             | 14 mM          | 1.0 mM           |
| <b>Very low nitrate</b>     | 0.0 mM         | 1.0 mM           |
| <b>Low nitrate</b>          | 2.4 mM         | 1.0 mM           |
| <b>High nitrate</b>         | 20.0 mM        | 1.0 mM           |
| <b>Very high nitrate</b>    | 36.0 mM        | 1.0 mM           |
| <b>Very low phosphate</b>   | 14 mM          | 0.0 mM           |
| <b>Low phosphate</b>        | 14 mM          | 0.1 mM           |
| <b>High phosphate</b>       | 14 mM          | 5.0 mM           |
| <b>Very high phosphate</b>  | 14 mM          | 10.0 mM          |

**Table 2.** ANOVA analysis of the effect of genotype, maternal environment and genotype-by-environment interactions on seed and seedling quality. Values show the  $-10 \log(P)$  \*.

| Traits                                 | Nitrate  |             |       | Phosphate |             |      |
|----------------------------------------|----------|-------------|-------|-----------|-------------|------|
|                                        | Genotype | Environment | G×E   | Genotype  | Environment | G×E  |
| Seed Size                              | 25.24    | 7.81        | 4.12  | 23.37     | 2.41        | 0.47 |
| Seed Weight                            | 27.38    | 8.88        | 6.06  | 24.17     | 5.71        | 3.91 |
| FWR                                    | 22.90    | 3.29        | 1.88  | 18.22     | 3.64        | 1.29 |
| DWR                                    | 22.42    | 4.09        | 3.85  | 16.60     | 3.16        | 0.75 |
| FWSH                                   | 25.07    | 5.89        | 3.19  | 18.45     | 3.64        | 2.32 |
| DWSH                                   | 22.91    | 4.67        | 2.95  | 20.05     | 5.07        | 2.54 |
| MRL                                    | 16.23    | 4.29        | 1.31  | 14.61     | 0.59        | 0.83 |
| NLR                                    | 16.08    | 0.04        | 0.43  | 17.05     | 0.48        | 1.49 |
| G <sub>max</sub> Water                 | 5.74     | 3.18        | 3.05  | 5.59      | 0.32        | 0.14 |
| t <sub>50</sub> <sup>-1</sup> Water    | 16.72    | 0.26        | 0.20  | 23.78     | 0.06        | 0.93 |
| G <sub>max</sub> NaCl                  | 13.57    | 2.25        | 2.31  | 10.16     | 1.55        | 1.04 |
| t <sub>50</sub> <sup>-1</sup> NaCl     | 16.85    | 0.11        | 1.02  | 27.48     | 1.89        | 0.92 |
| G <sub>max</sub> HT                    | 27.43    | 3.45        | 3.63  | 24.73     | 1.88        | 2.27 |
| t <sub>50</sub> <sup>-1</sup> HT       | 29.69    | 11.88       | 4.08  | 23.38     | 0.89        | 1.58 |
| G <sub>max</sub> Mannitol              | 16.27    | 7.77        | 8.79  | 9.98      | 0.02        | 0.01 |
| t <sub>50</sub> <sup>-1</sup> Mannitol | 23.71    | 7.55        | 10.62 | 16.50     | 0.71        | 2.14 |
| Nitrate Content                        | 1.66     | 0.06        | 0.77  | 2.15      | 3.03        | 3.39 |
| Phytate Content                        | 12.06    | 2.74        | 1.90  | 16.85     | 21.16       | 4.22 |
| ABA Content                            | 6.84     | 1.04        | 1.04  | 4.95      | 3.21        | 1.12 |

\* Coloured cells demonstrate significant levels (Dark green: P<0.001; Light green: P<0.01; Very light green: P<0.05) and non-coloured spots represent non-significant values.

### Figure legends

**Fig. 1.** Effects of maternal nutritional environment on seed germination traits of **MM** and **PI**. **A**, Germination in water; **B**, Germination at high temperature (35°C); **C**,  $t_{50}^{-1}$  at high temperature (35°C); **D**, Germination in mannitol (-0.5 MPa); **E**, Germination in salt (-0.5 MPa); **F**,  $t_{50}^{-1}$  in salt (-0.5 MPa) in different concentrations of nitrate (0N, 2.4N, 14N, 20N and 36N) and phosphate (0P, 0.1P, 1P, 5P and 10P). Letters above the bars represent significant differences between different concentrations of nitrate or phosphate within each genotype ( $p < 0.05$ ).

**Fig. 2.** Effects of maternal nutritional environments on seed quality of **MM** and **PI**. **A**, Seed size; **B**, Seed weight of the plants grown in different concentrations of nitrate (0N, 2.4N, 14N, 20N and 36N) and phosphate (0P, 0.1P, 1P, 5P and 10P). On left, the average of seed size and seed weight (regardless of maternal environments) in each genotype are presented.

**Fig. 3.** Effects of maternal nutritional environments on seedling quality traits of **MM** and **PI**. **A**, Shoot fresh weight; **B**, Root fresh weight; **C**, Main root length; **D**, Number of lateral roots in different concentrations of nitrate (0N, 2.4N, 14N, 20N and 36N) and phosphate (0P, 0.1P, 1P, 5P and 10P). Letters above the bars (A, B) and lines (C, D) represent significant differences between different concentrations of nitrate or phosphate within each genotype ( $p < 0.05$ ).

**Fig. 4.** Heatmap of trait by trait correlations of seed and seedling traits in **MM** and **PI**: in response to different concentration of **(A)** phosphate and **(B)** nitrate.

**Fig. 5.** Principle component analysis of known primary metabolites in **MM**, **(M)** and **PI**, **(P)** seeds in response to different concentration of nitrate (0N, 2.4N, 14N, 20N and 36N) and phosphate (0P, 0.1P, 1P, 5P and 10P) during maternal growth.

**Fig. 6.** Overview of metabolic changes between the genotypes influenced by maternal nutritional environments. Metabolites are shown in three colours: **Black**, Non detected metabolites; **Purple**, Detected metabolites not significantly influenced by environment; Other

colours, Detected metabolites, in different categories, significantly influenced by at least one environment; **Red**, Amino acid; **Light Brown**, Organic acid; **Green**, Sugars and sugar alcohols; **Blue**, Other categories. Heatmaps contain four rows: top two rows represent PI (**P-P**) and MM (**M-P**) in different concentrations of phosphate (0, 0.1, 1, 5 and 10 mM from left to right). The bottom two rows represent PI (**P-N**) and MM (**M-N**) in different concentrations of nitrate (0, 2.4, 14, 20 and 36 mM). Colour key represents the normalized metabolite content of seeds.

**Fig. 7.** Correlation matrix of metabolites and seed and seedling quality traits. On right seed and seedling traits of two tomato genotypes: **MM** in black square and **PI** in white square in two different nutritional conditions: **Nitrate**, diagonal lines and **Phosphate**, dotted square are presented. At the bottom metabolites are presented in details and on top they are classified as groups of metabolites. Colour key table provides graphical representation of the correlation values of the traits and metabolites. The black rectangles indicate correlations mentioned in the result.

**Fig. 8.** Summarizing the significant effects of nutritional maternal environments on seed size, seed weight, germination at high temperature ( $G_{\max}$  HT) and the production of GABA in seeds. Nitrate positively regulated seed size for both genotypes while effect of nitrate on GABA accumulation and  $G_{\max}$  HT was only observed when applied to MM seeds. Seed weight of both genotypes was positively regulated by phosphate content however, the (negative) effect of phosphate on GABA accumulation and  $G_{\max}$  HT was only observed for MM seeds. Solid and dashed lines indicating the positive and negative effects, respectively.

Figure 1.

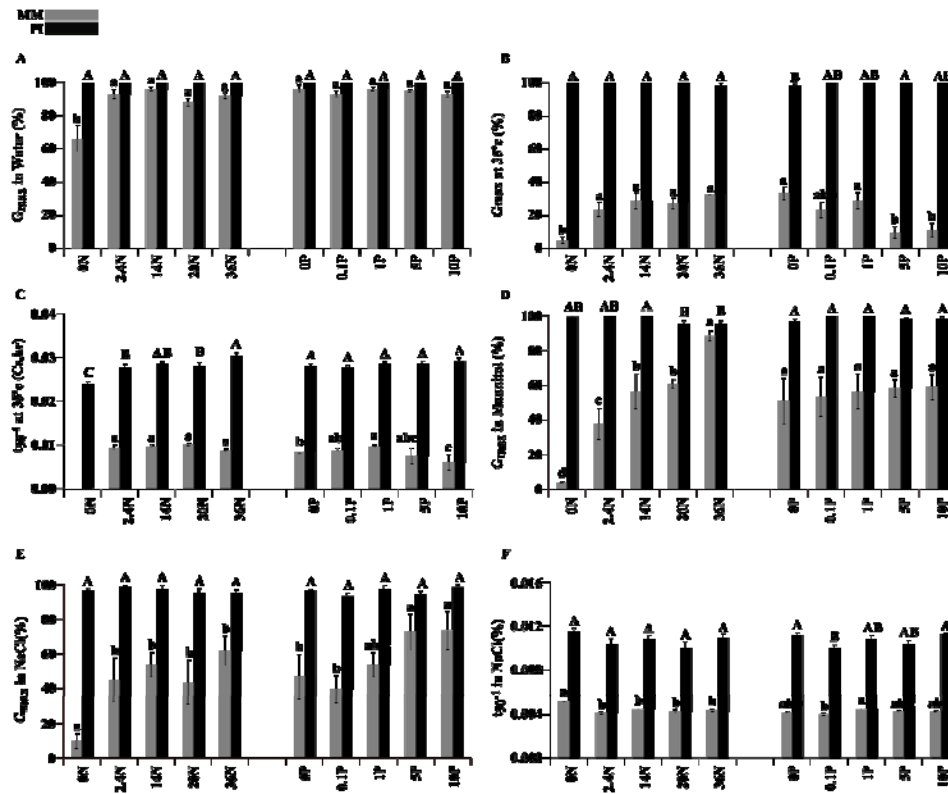

Figure 2. (in colour online)

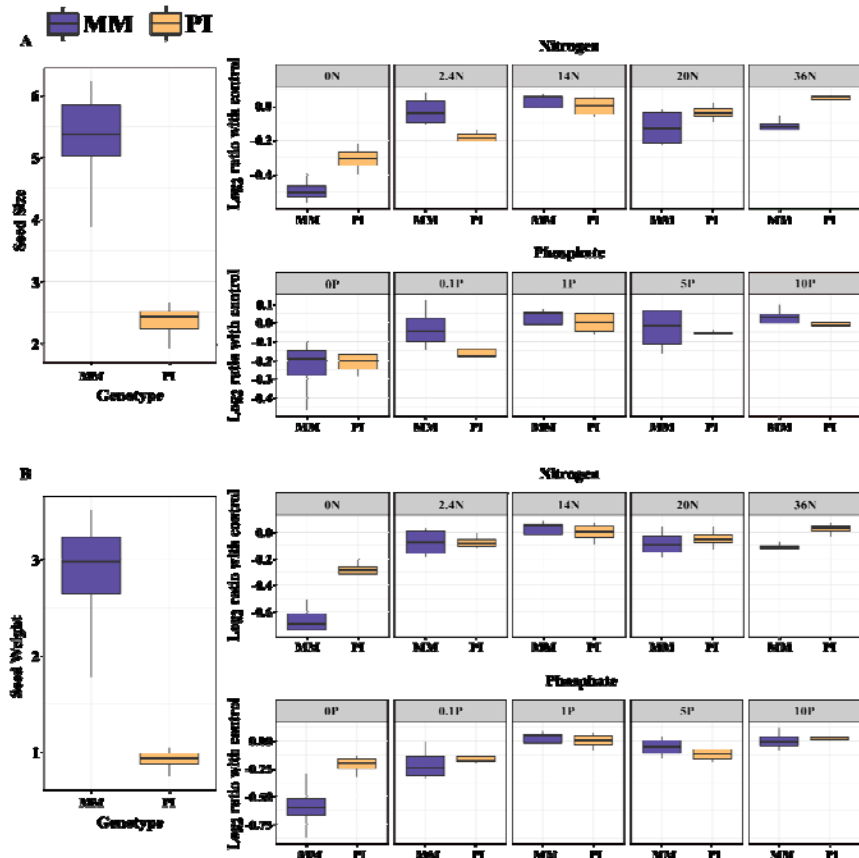

Figure 3.

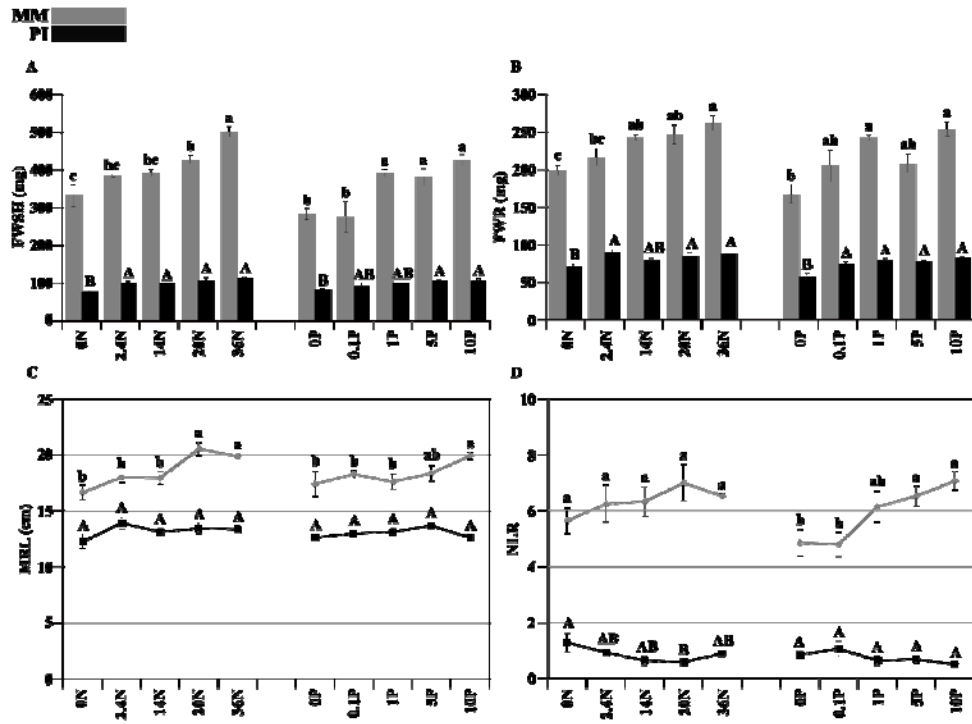



Figure 4. (in colour in print and online)

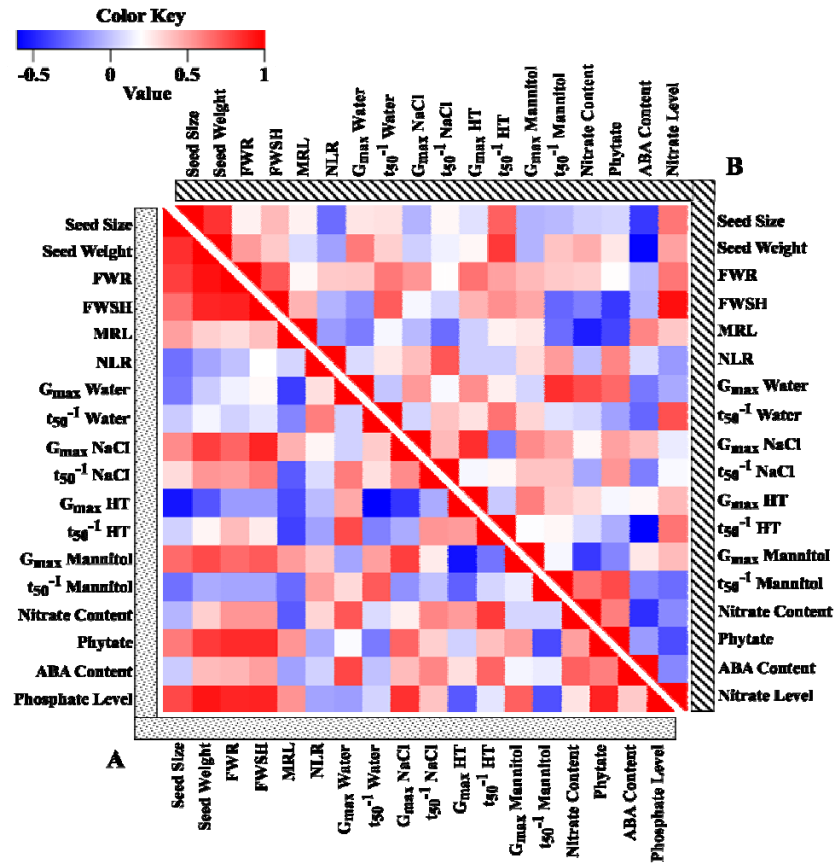

**Figure 5.** (in colour in print and online)

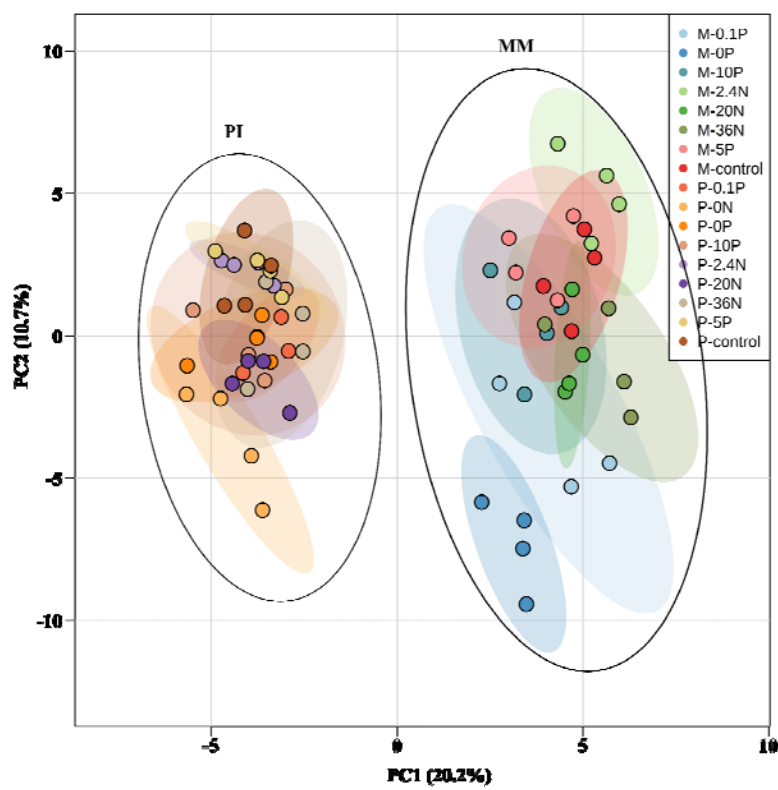

Figure 6. (in colour in print and online)

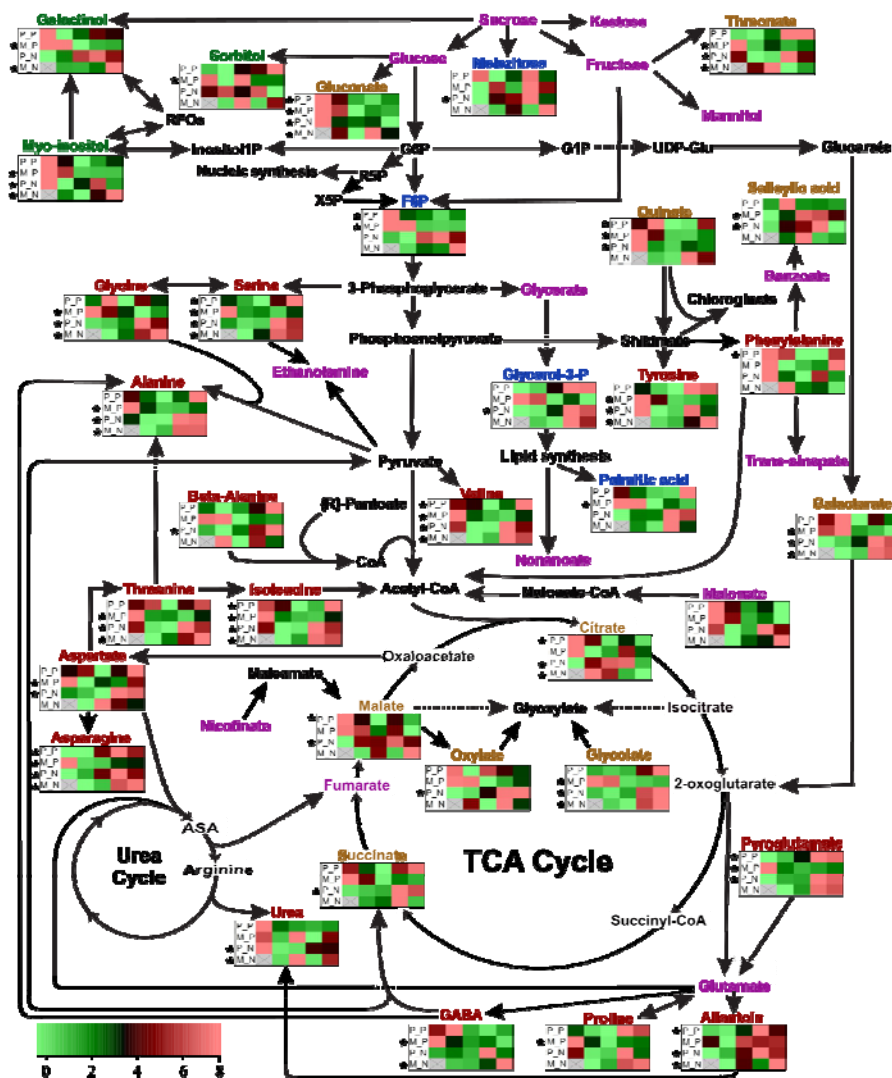

Figure 7. (in colour in print and online)

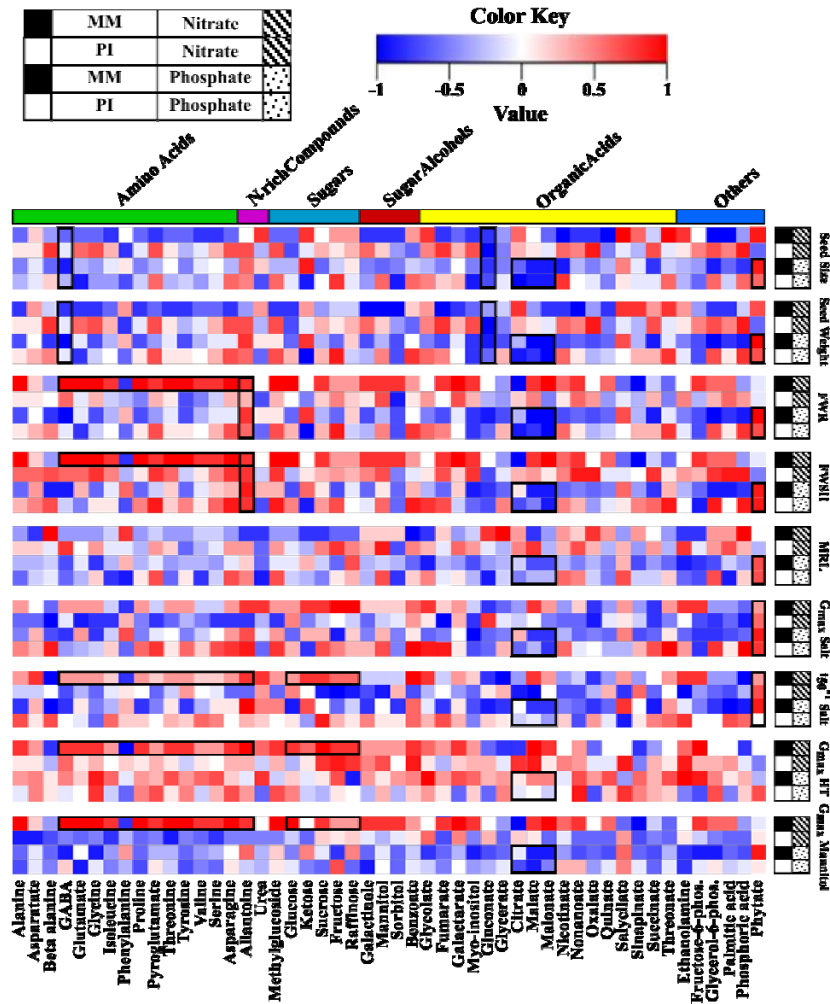

Figure 8.

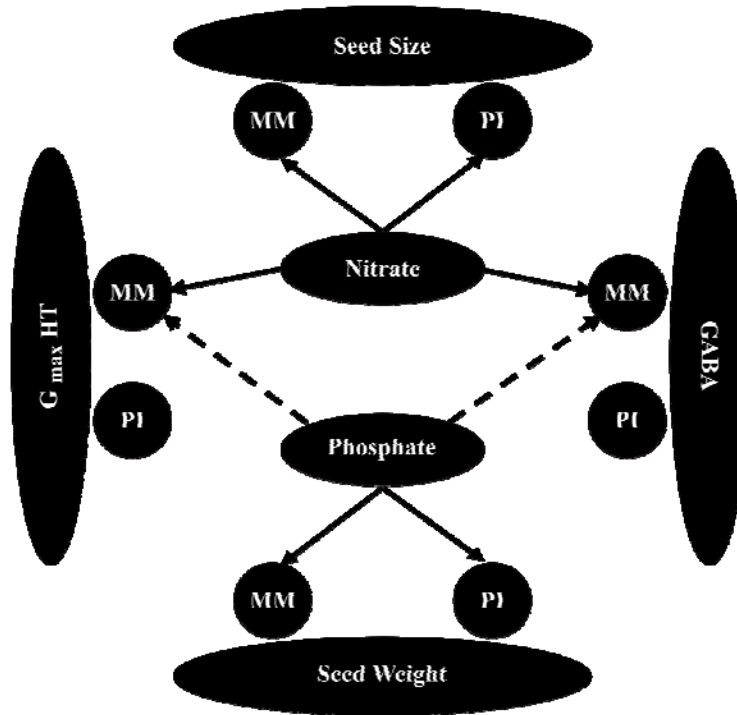

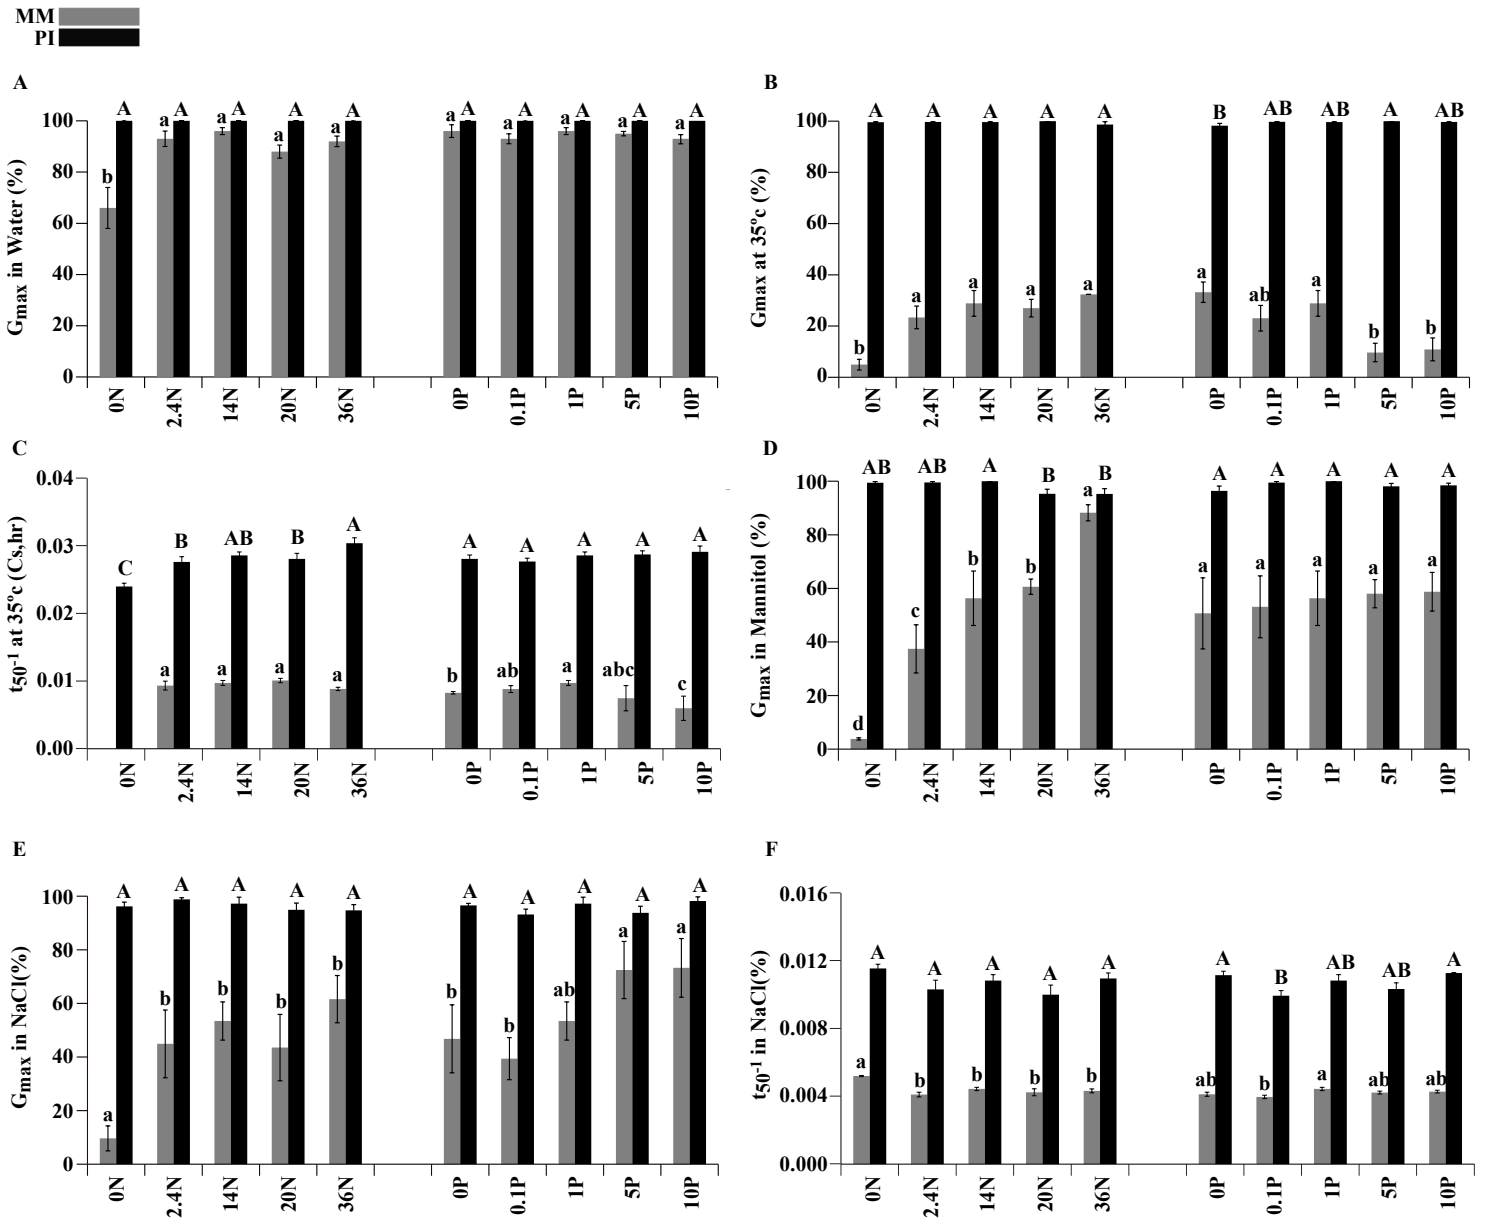

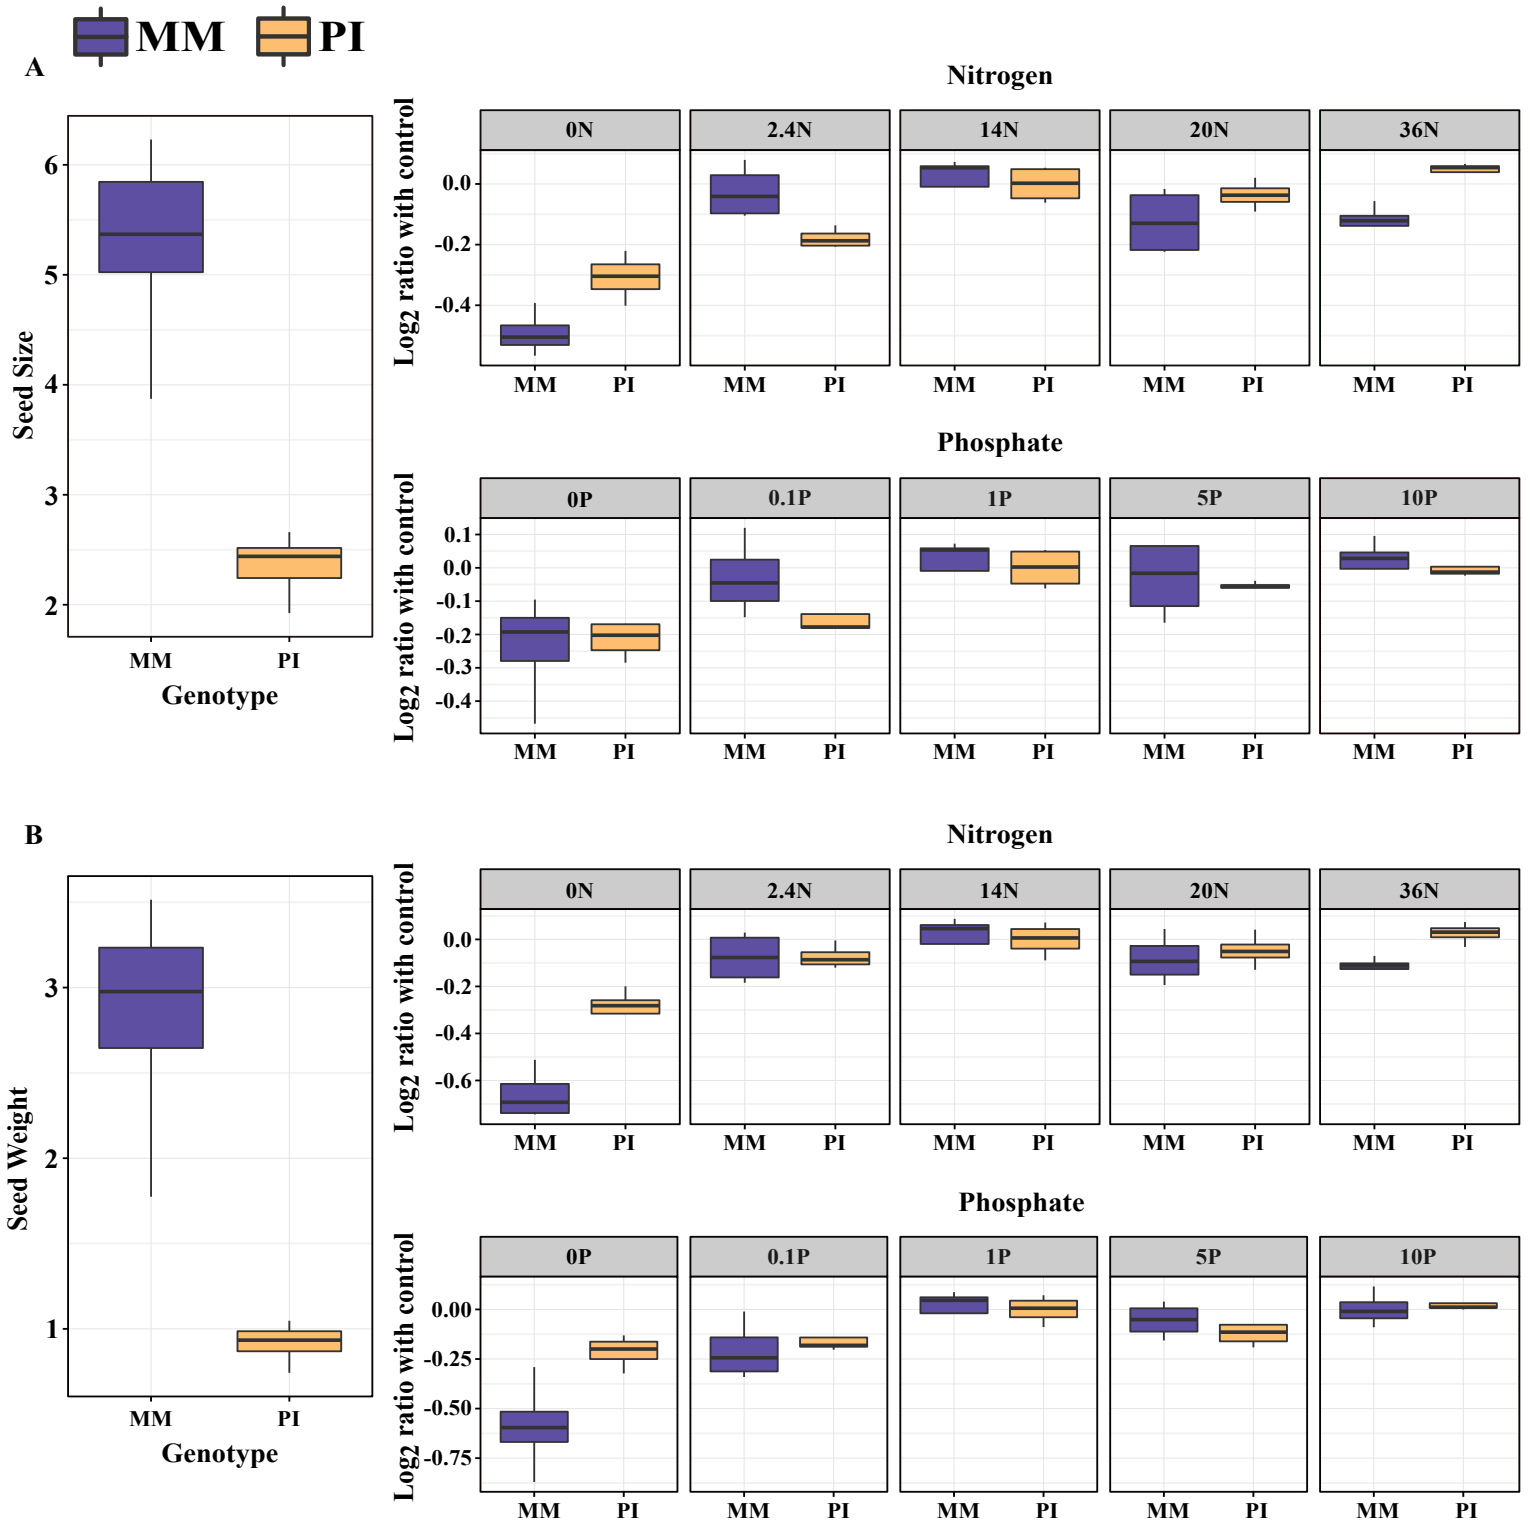

MM   
 PI 

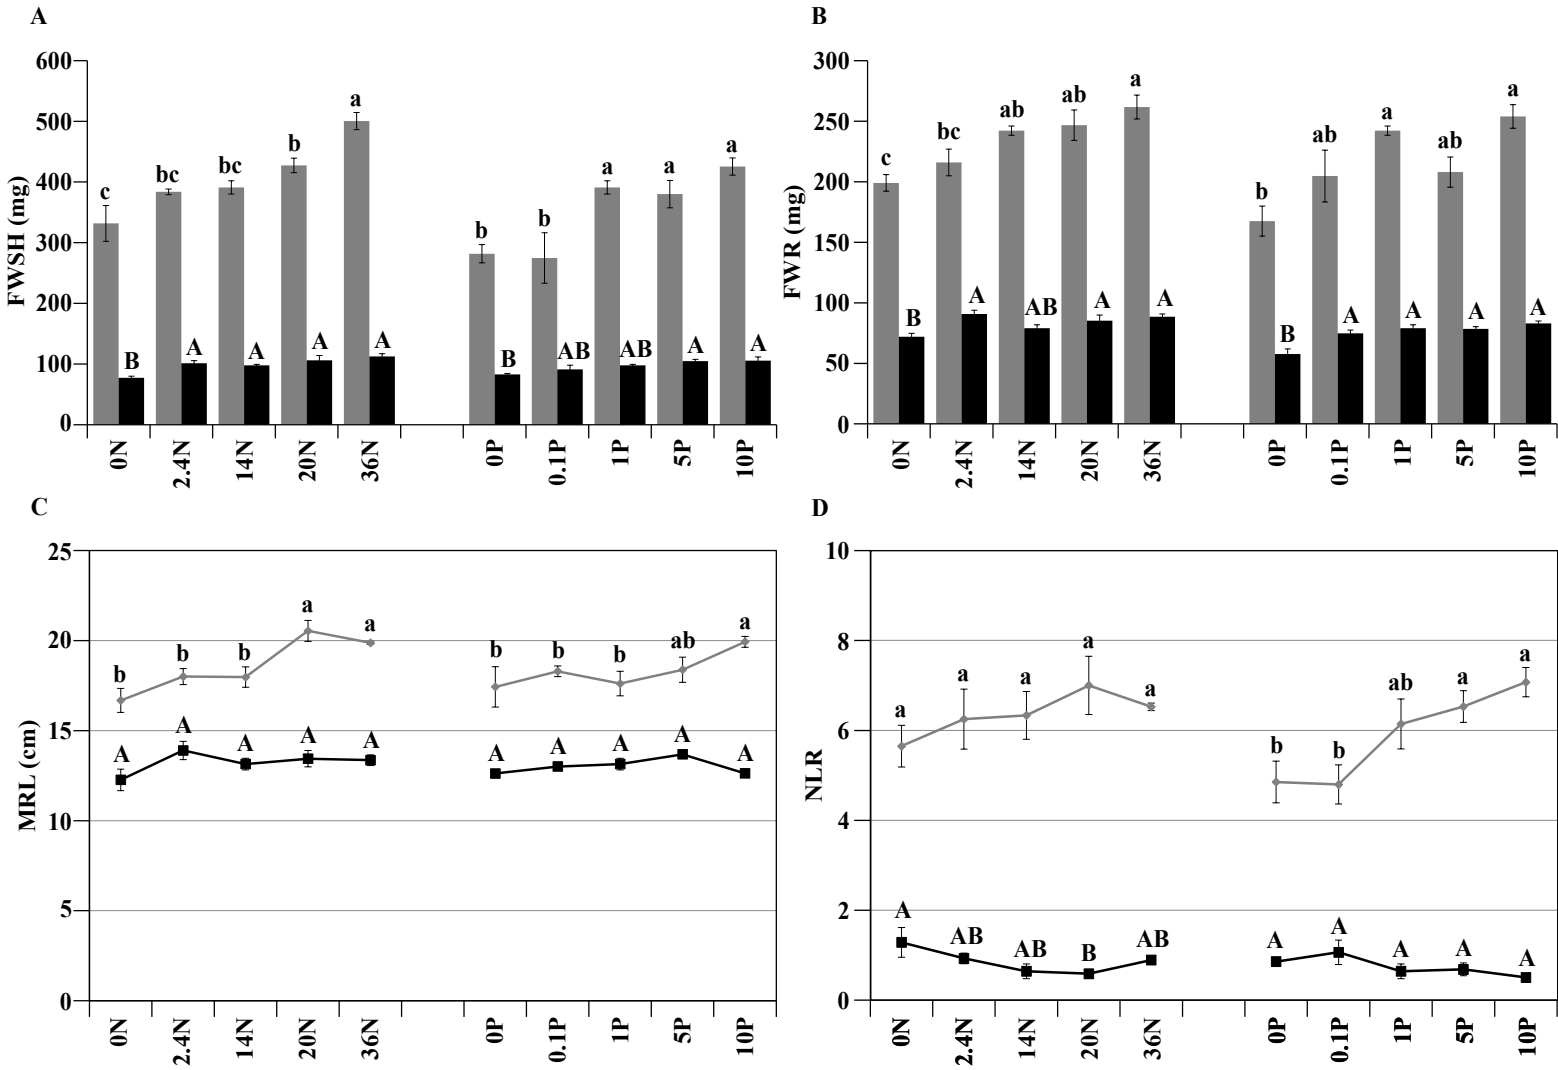



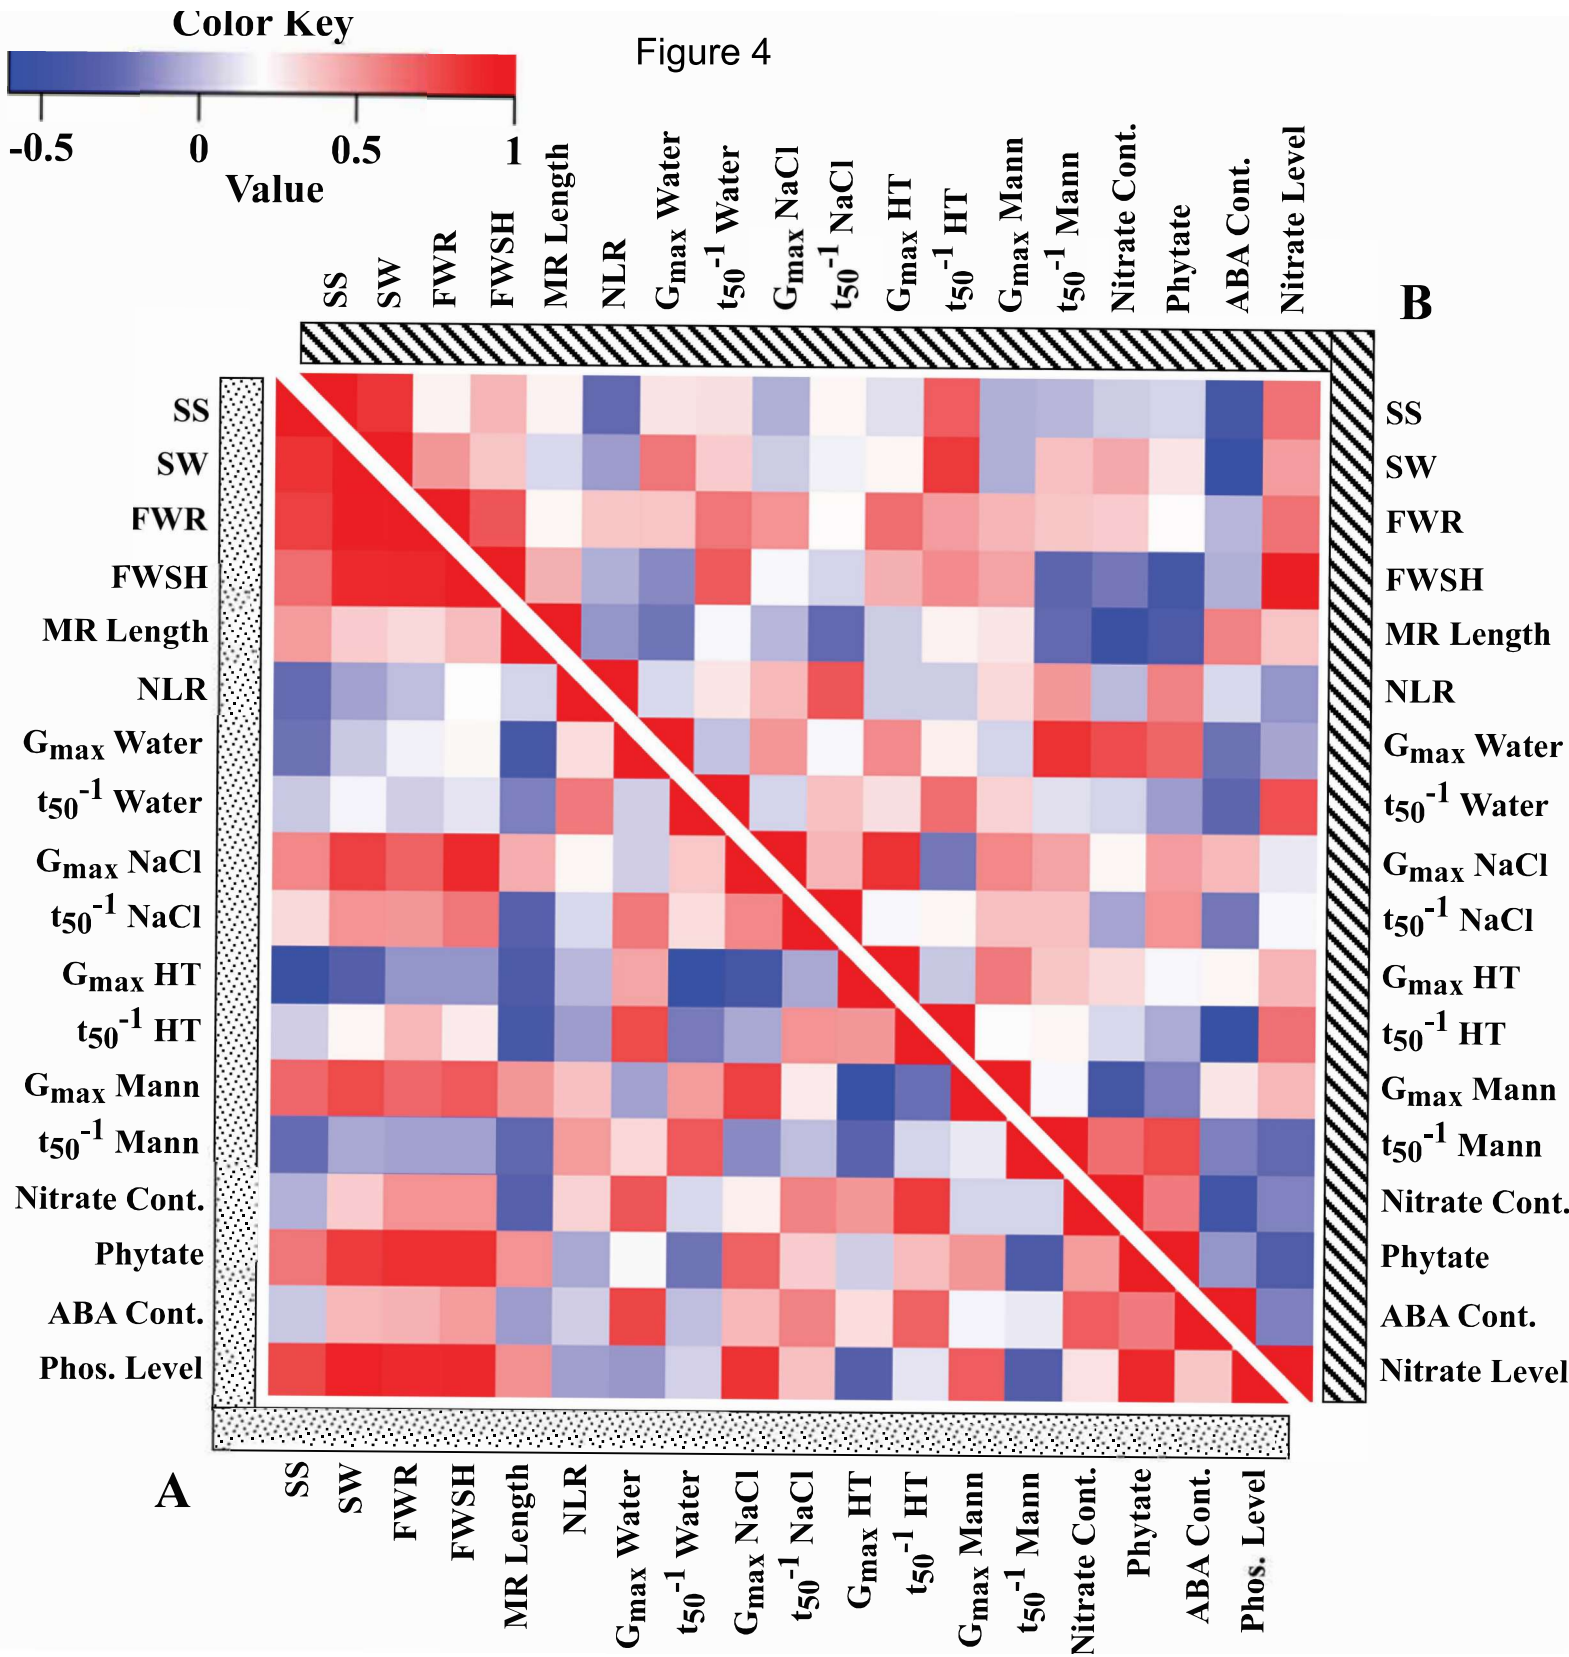

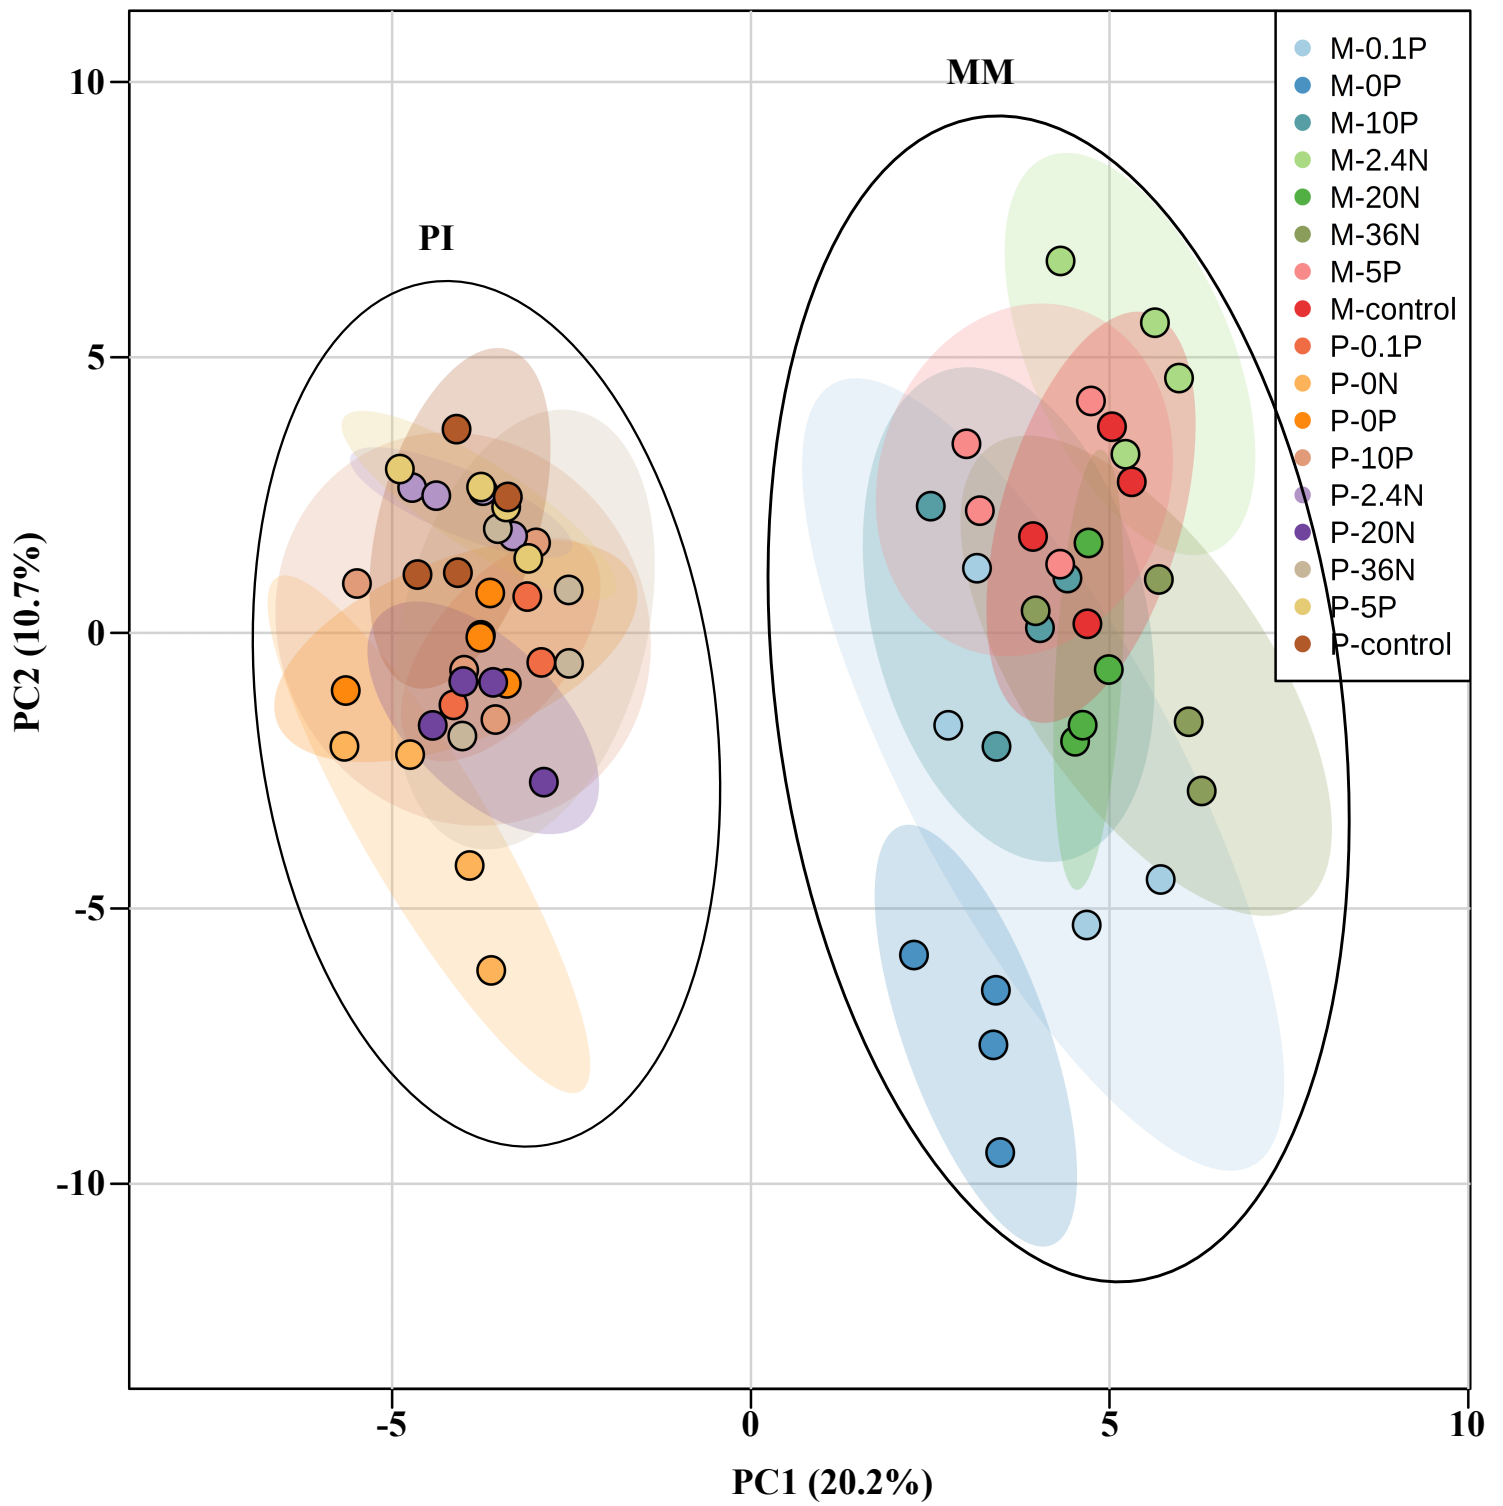

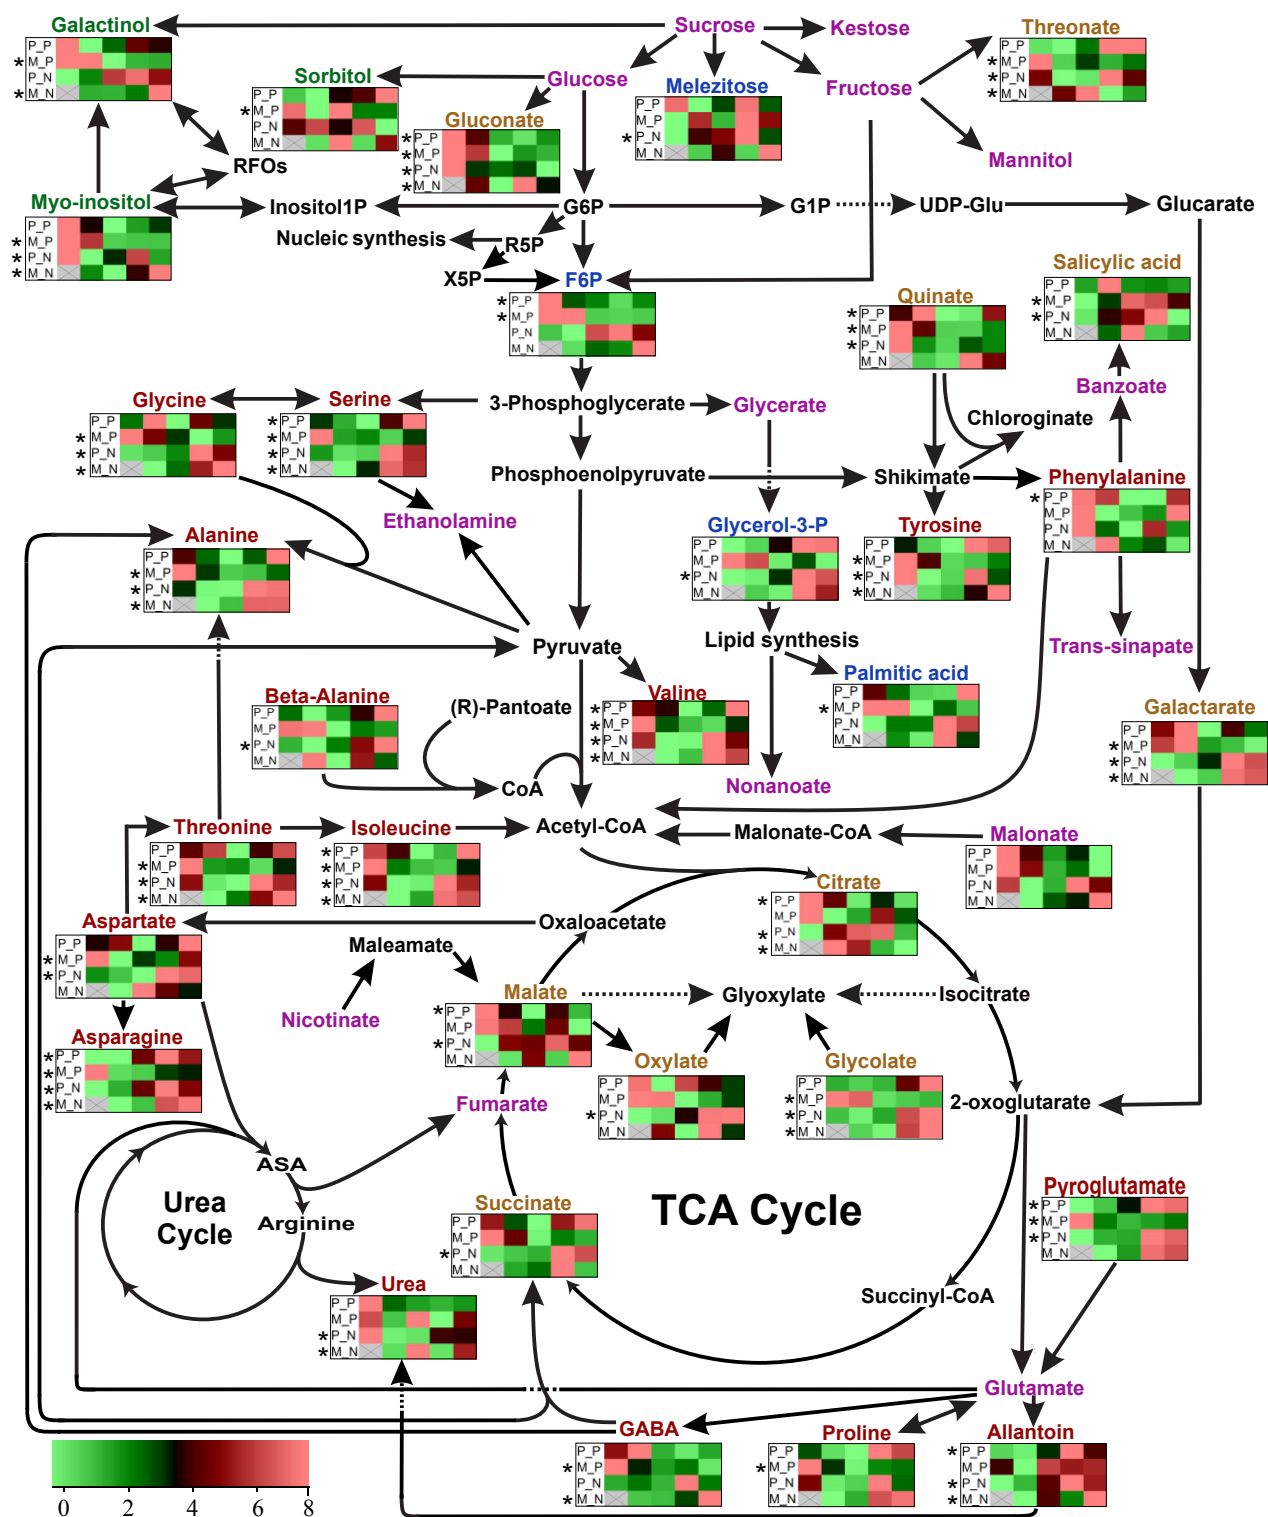

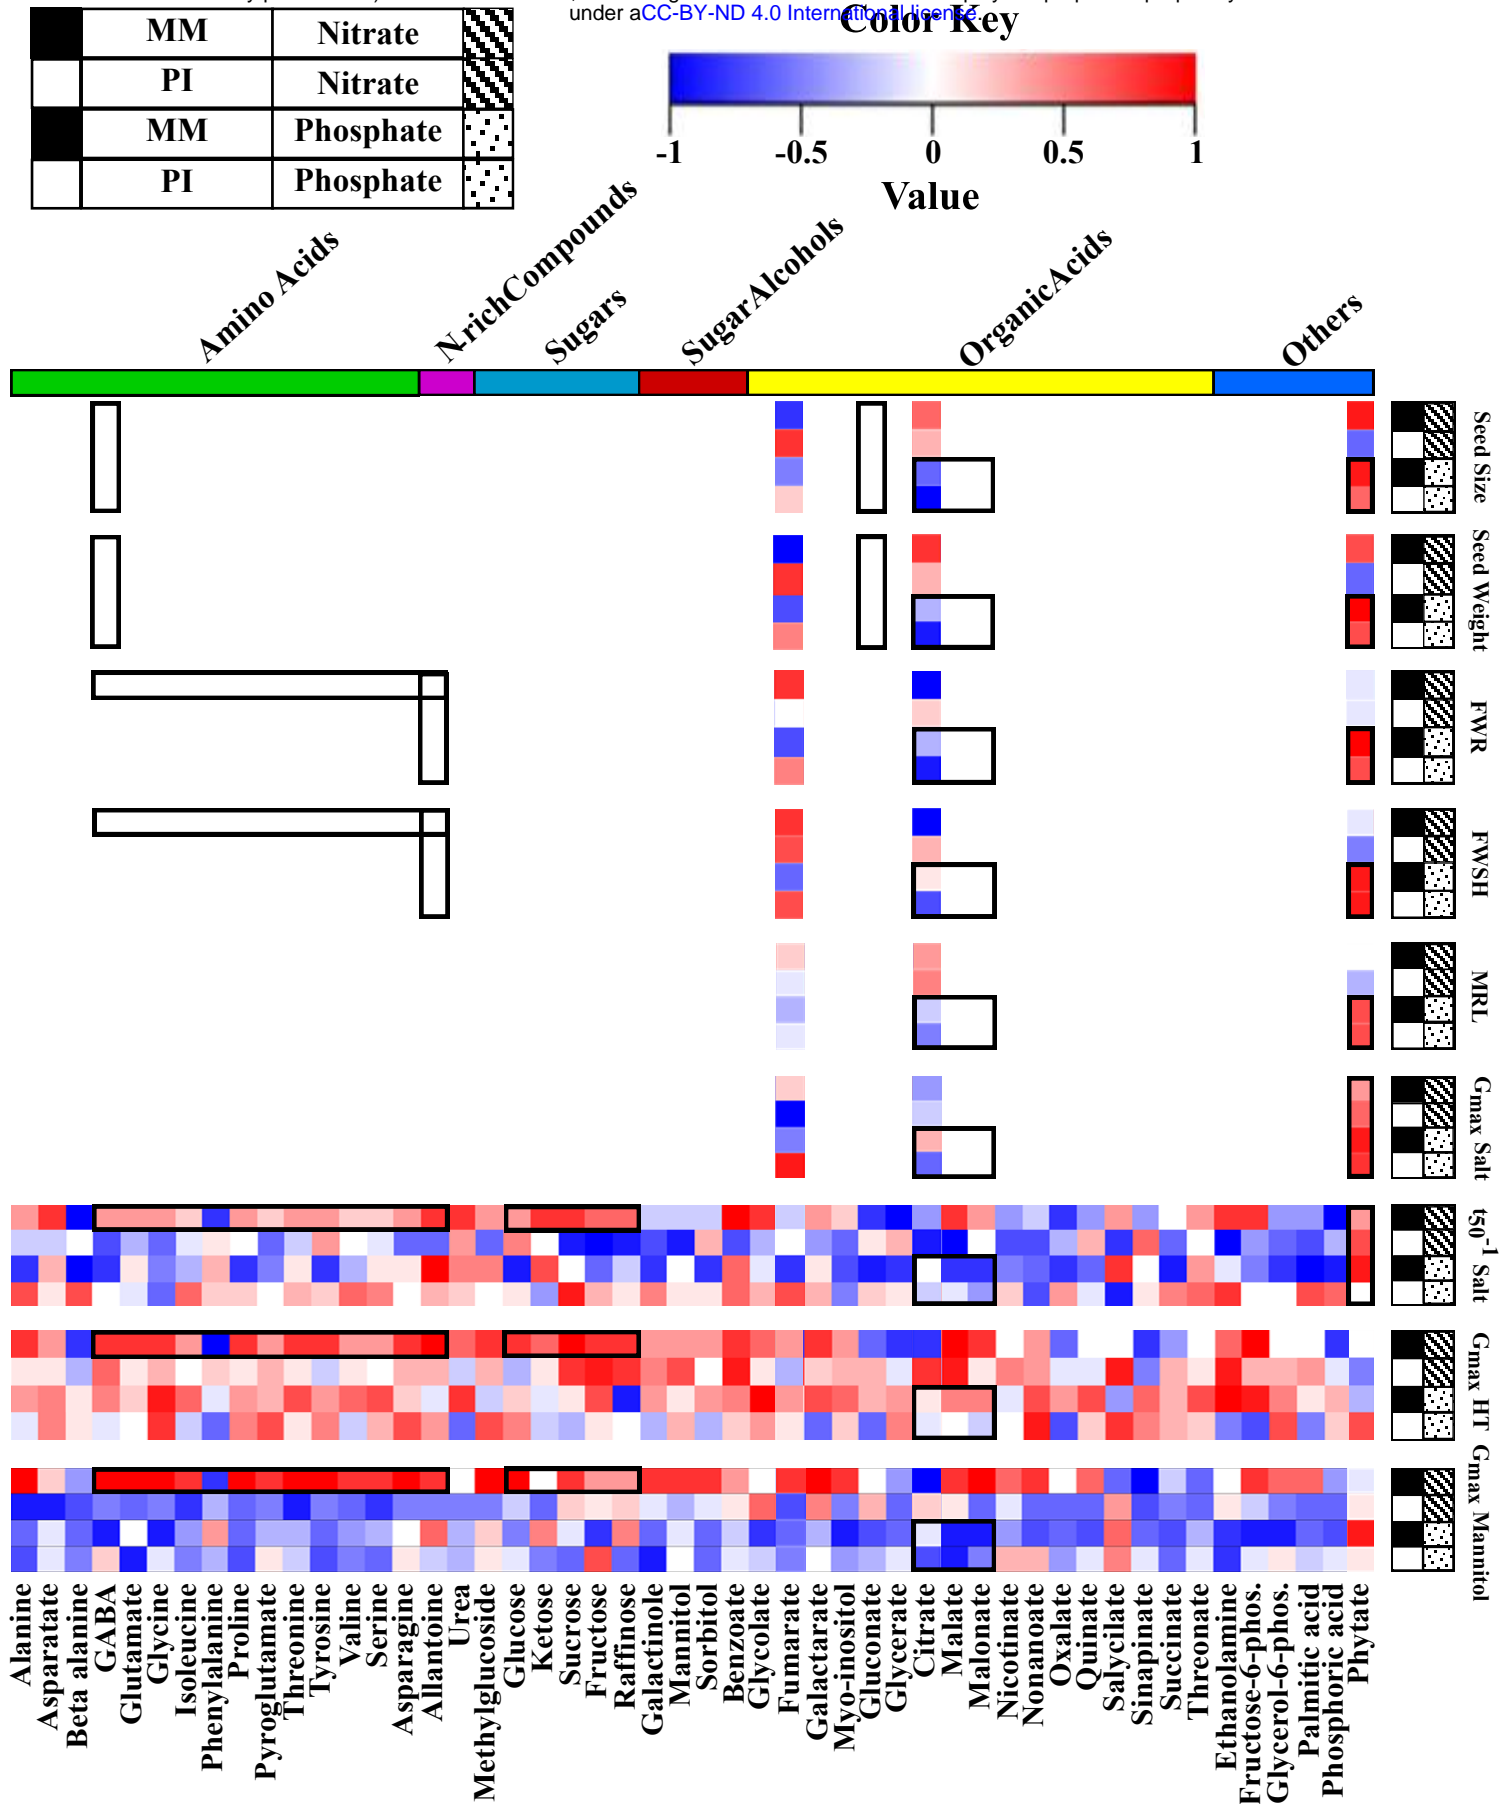

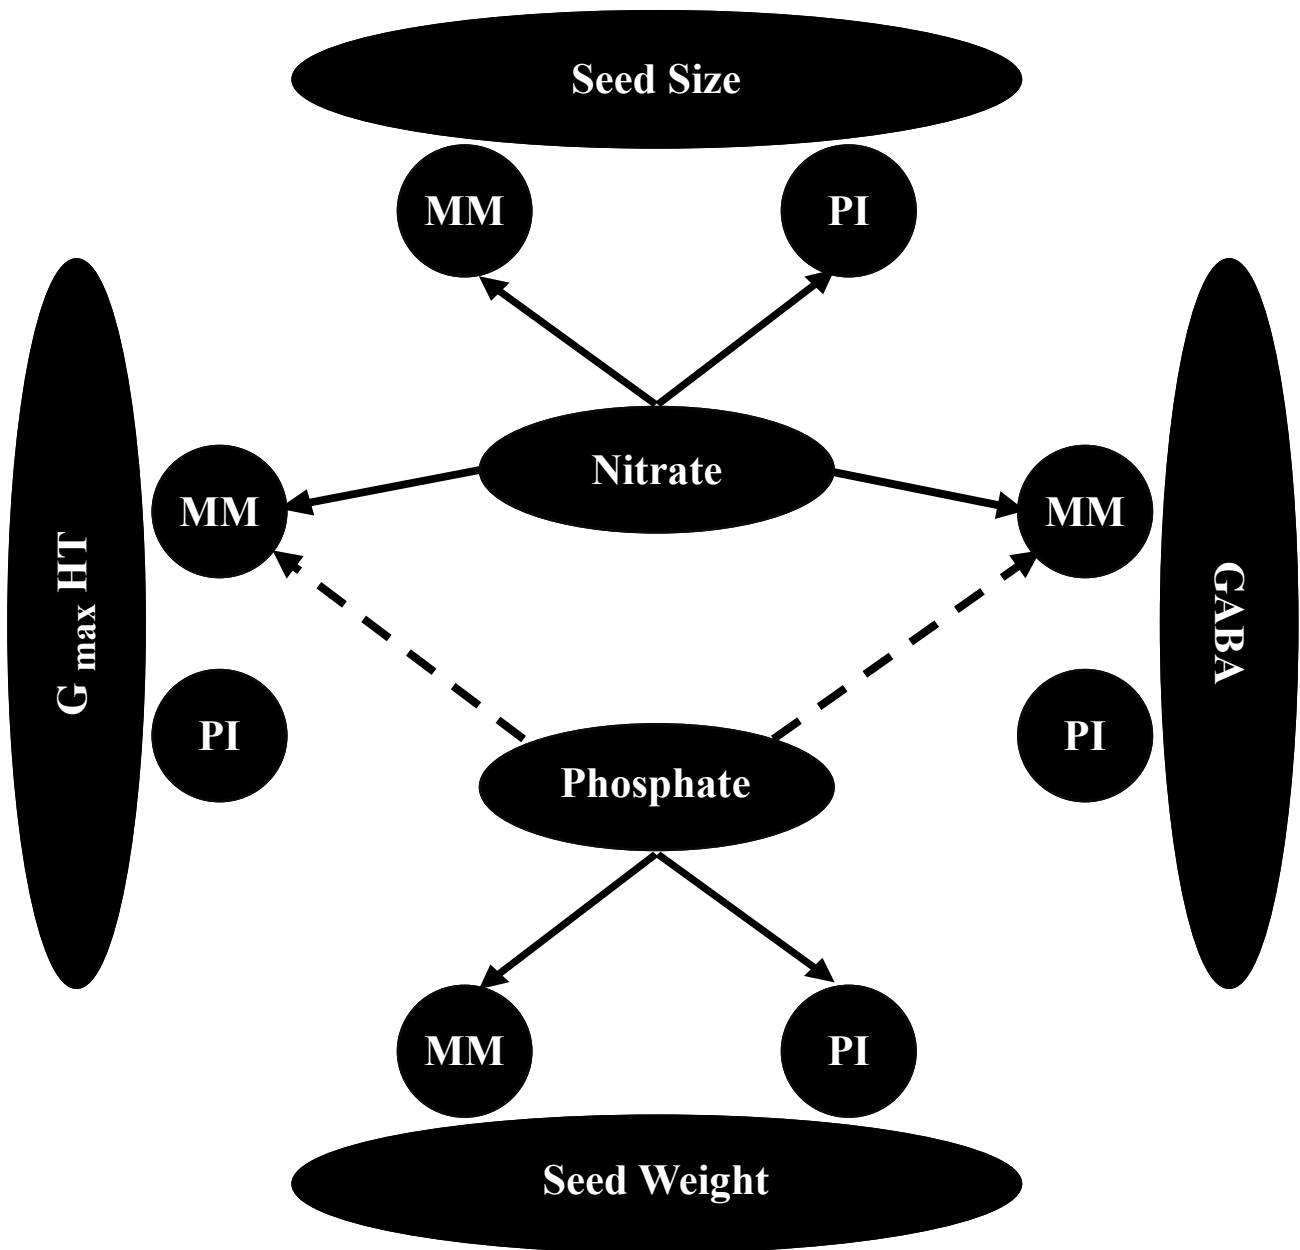

Source: https://www.biorxiv.org/content/10.1101/458836v2.full.pdf
